# Supplementary material
Source: PubMed Central journal article supplement (PMC5847395)
Supplement: NIHMS883218-supplement-1.pdf [file NIHMS883218-supplement-1.pdf]

### **Figure S1. Uaf, TD1 and TD2 iPSC lines exhibited normal karyotypes**

### **Figure S2. Expression of pluripotency markers OCT4 and TRA-1-60 in iPSCs**

iPSC lines were double stained for pluripotency markers OCT4 and TRA-1-60. The percentage of double positive cells for each line was analyzed by flow cytometry.

- A. iPSCs of unrelated unaffected subject;
- B. iPSCs of unaffected subject (4002);
- C. iPSCs of TD1 patient (5001);
- D. iPSCs of TD2 patient (5002);
- E. Percentage of OCT4 and TRA-1-60 double positive cells for each iPSC line.

### **Figure S3. Expression of neural progenitor markers NESTIN and SOX2 in iPSC-derived NPCs**

NPC lines were stained for neural progenitor markers NESTIN and SOX2. Percentage of NESTIN positive or SOX2 positive cells for each line was analyzed by flow cytometry.

- A. NPCs of unrelated unaffected subject;
- B. NPCs of unaffected subject (4002);
- C. NPCs of TD1 patient (5001);
- D. NPCs of TD2 patient (5002).

### **Figure S4. Characterization of iPSC, iPSC-derived NPCs and neurons by ICC**

- A. The iPSC colonies expressed pluripotency markers: Nanog and Oct4.
- B. Neural progenitor cells (NPCs) derived from iPSCs were stained positive for NPCs markers: Nestin and Musashi1. Also, NPCs expressed neuronal marker: Class III  $\beta$ -tubulin.
- C. Glutamatergic neuron marker VGLUT1, GABAergic neuron marker VGAT or glial cell marker GFAP was detected in subpopulations of iPSC-derived D30 neurons.

### **Figure S5. Functional neurons were differentiated from iPSC-derived NPCs**

A-E. Calcium imaging showed that the D30 neurons exhibit spontaneous and potassium-stimulated calcium influx.

F and G. These functional Day 30 neurons expressed neuronal markers MAP2 and Class III  $\beta$ -tubulin as well as synaptic vesicle protein synapsin I (SYN1).

**Figure S6. Inhibition of NMD eliminated the expression difference of the *PNKD* (L) transcript between unaffected and TD-affected neurons.**

A. Sanger Sequencing confirmed that the unrelated unaffected (Urel\_Uaf) subject doesn't carry the *PNKD* nonsense mutation.

B. The Urel\_Uaf D30 neurons expressed *PNKD* (L) protein which was comparable to Uaf D30 neurons.

C. Without NMD inhibition (untreated and DMSO), TD1 and TD2 D30 neurons expressed about half of *PNKD* (L) transcript compared to the Uaf D30 neurons. Inhibition of NMD by treating D29 neurons with 100ug/ml CHX for ~15 hrs led to increase of *PNKD* (L) transcript in all lines. Importantly, inhibition of NMD eliminated the difference of *PNKD* (L) transcript level between TD and Uaf D30 neurons.

**Figure S7. *PNKD* (L) protein is plasma membrane-associated and co-localizes with the RIMS1 $\alpha$  protein in the iPSC-derived neurons.**

A. iPSC-derived neurons were transfected with plasmid expressing the FLAG-*PNKD*(L) protein. anti-FLAG antibody was used to detect the *PNKD* (L) protein whose expression was enriched in the plasma membrane and the neurites.

B. RIMS1 $\alpha$ -Myc was overexpressed in the iPSC-derived neurons by transfection. The anti-Myc antibody was used to detect the RIMS1 $\alpha$  protein which is localized in the cell body and neurites of the iPSC-derived neurons.

C. Plasmids expressing the FLAG-*PNKD*(L) and RIMS1 $\alpha$ -Myc were co-transfected into the iPSC-derived neurons. anti-*PNKD*(L)(C-terminus) and anti-Myc antibodies were used to detect the *PNKD* (L) and the RIMS1 $\alpha$  proteins which were co-localized in the cell body and the neurites of the iPSC-derived neurons.

**Figure S8 *PNKD* expression in developmental human brains**

A. The "RNA-Seq Genecode v10 summarized to genes" dataset was downloaded from the BrainSpan website. RPKM values of *PNKD* gene were extracted and plotted using the "age" and "structures". There are 31 ages shown at the x-axis and 26 brain

structures represented by color coded lines. In general, the *PNKD* gene expression increases during human brain development.

**B.** The “RNA-Seq Genecode v10 summarized to exons” dataset was downloaded from the BrainSpan website. RPKM values of the 13 exons of the *PNKD* gene were extracted and plotted using the “age” and “structures”. There are 30 ages shown at the x-axis and 26 brain structures represented by color coded lines. The exon 3 is only included in the *PNKD* (S) transcript. The panel B shows the RPKM values of the exon 3 expression, which has higher expression in the 6-month and 4-year old brains.

**C.** Panel C shows the RPKM values of the exon 4 which is only included in the *PNKD* (M) transcript. The expression of the exon 4 is low in the human brain and doesn't exhibit a significant increase along with the brain maturation.

**D.** Panel D shows the PRKM values of the exon 6 which is shared by the *PNKD* (L) and the *PNKD* (M) transcripts. The expression of the exon 6 increases dramatically during human brain development. Since the *PNKD* (M) transcript is expressed low in the human brain, the expression increase of the exon 6 is probably due to the expression increase of the *PNKD* (L) transcript.

**RPKM:** Reads Per Kilobase of transcript per Million mapped reads

### **Figure S9 *RIMS1* expression in developmental human brains**

**A.** The “RNA-Seq Genecode v10 summarized to genes” dataset was downloaded from the BrainSpan website. RPKM values of the *RIMS1* gene were extracted and plotted using the “age” and “structures”. There are 31 ages shown at the x-axis and 26 brain structures represented by color coded lines. In general, the *PNKD* gene expression increases during human brain development.

**B.** The “RNA-Seq Genecode v10 summarized to exons” dataset was downloaded from the BrainSpan website. RPKM values of exon 3 of the *RIMS1* gene were extracted and plotted using the “age” and “structures”. The exon 3 is only included in the *RIMS1* $\alpha$ . There are 30 ages shown at the x-axis and 26 brain structures represented by color coded lines.

### **Figure S10 *PNKD* and *RIMS1* expression from the Human Brain Transcriptome (HBT) database.**

Gene expression was measured in 6 brain regions at 15 developmental periods. For each developmental period, multiple samples were analyzed (experimental details can be found in <http://hbatlas.org/files/nature10523-s1.pdf>)

NCX: neocortex; STR: striatum; HIP: hippocampus; MD: mediodorsal nucleus of the thalamus; AMY: amygdala; CBC: cerebellar cortex.

**A.** *PNKD* expression increases from period 1 to period 12 during human brain development. STR might have higher *PNKD* expression from period 8 to 12 than other brain regions.

**B.** *RIMS1* expression increases dramatically from period 1 to period 6 and reaches to a plateau in all brain regions except for CBC. The CBC has higher *RIMS1* expression from period 8 to period 15 than other brain regions.

Period 1 (Embryonic development, 4< Age <8 PCW)

Period 2 (Early fetal development, 8< Age <10 PCW)

Period 3 (Early fetal development, 10< Age <13 PCW)

Period 4 (Early mid-fetal development, 13< Age <16 PCW)

Period 5 (Early mid-fetal development, 16< Age <19 PCW)

Period 6 (Late mid-fetal development, 19< Age <24 PCW)

Period 7 (Late fetal development, 24< Age <38 PCW)

Period 8 (Neonatal and early infancy, birth ≤ Age <6 postnatal months)

Period 9 (Late infancy, 6< Age <12 postnatal months)

Period 10 (Early childhood, 1< Age <6 years)

Period 11 (Middle and late childhood, 6< Age <12 years)

Period 12 (Adolescence, 12< Age <20 years)

Period 13 (Young adulthood, 20< Age <40 years)

Period 14 (Middle adulthood, 40< Age <60 years)

Period 15 (Late adulthood, 60 years +)

**Figure S11 *PNKD* mutant transcript was detected in TD neurons and was translated into truncated protein in 293FT cells.**

**A.** *PNKD* (L) transcript harboring the nonsense variant was detected in the TD1 and TD2 iPSC-derived neurons by Sanger sequencing, suggesting the nonsense-mediated decay was not complete.

**B.** By overexpressing the *PNKD* (L) wildtype and mutant transcripts together in 293FT cells, localization of the PNKD (L)\_wt and PNKD (L)\_truncated proteins can be visualized by immunocytochemistry.
