# Supplementary material
Source: PubMed Central journal article supplement (PMC5847395)
Supplement: NIHMS883218-supplement-4.pdf [file NIHMS883218-supplement-4.pdf]

**A**

Scatter - Uaf\_unrelated iPSC - All Events

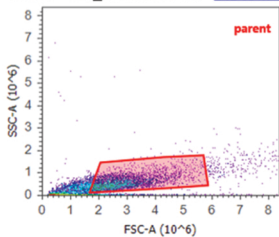

Uaf\_unrelated iPSC - parent

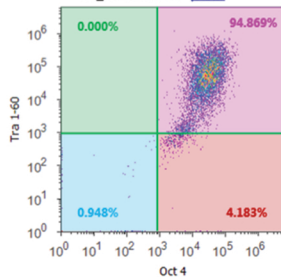

Experiment Name: iPSC Oct4&amp;Tra-1-60

Specimen Name: Specimen

Sample Name: Uaf\_unrelated iPSC

Showing 16,208 of 16,208 events.

| Name       | Event Count | % Parent | % Total  |
|------------|-------------|----------|----------|
| All Events | 16,208      | 100.000% | 100.000% |
| parent     | 7,172       | 44.250%  | 44.250%  |
| 0.000%     | 0           | 0.000%   | 0.000%   |
| 94.869%    | 6,804       | 94.869%  | 41.979%  |
| 0.948%     | 68          | 0.948%   | 0.420%   |
| 4.183%     | 300         | 4.183%   | 1.851%   |

**B**

Scatter - 4002#1 iPSC - All Events

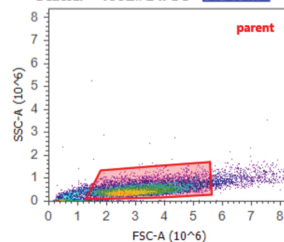

4002#1 iPSC - parent

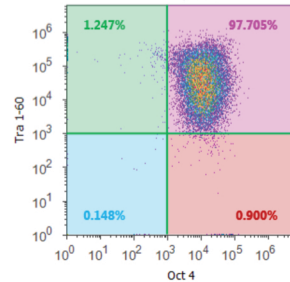

Experiment Name: iPSC Oct4&amp;Tra-1-60

Specimen Name: Specimen

Sample Name: 4002#1 iPSC

Showing 21,364 of 21,364 events.

| Name       | Event Count | % Parent | % Total  |
|------------|-------------|----------|----------|
| All Events | 21,364      | 100.000% | 100.000% |
| parent     | 17,563      | 82.208%  | 82.208%  |
| 1.247%     | 219         | 1.247%   | 1.025%   |
| 97.705%    | 17,160      | 97.705%  | 80.322%  |
| 0.148%     | 26          | 0.148%   | 0.122%   |
| 0.900%     | 158         | 0.900%   | 0.740%   |

**C**

Scatter - 5001#1 iPSC - All Events

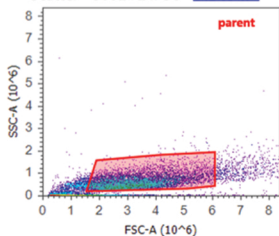

5001#1 iPSC - parent

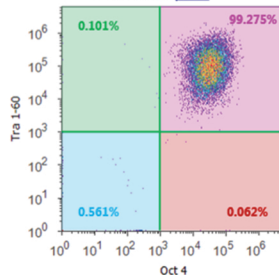

Experiment Name: iPSC Oct4&amp;Tra-1-60

Specimen Name: Specimen

Sample Name: 5001#1 iPSC

Showing 22,406 of 22,406 events.

| Name       | Event Count | % Parent | % Total  |
|------------|-------------|----------|----------|
| All Events | 22,406      | 100.000% | 100.000% |
| parent     | 12,831      | 57.266%  | 57.266%  |
| 0.101%     | 13          | 0.101%   | 0.058%   |
| 99.275%    | 12,738      | 99.275%  | 56.851%  |
| 0.561%     | 72          | 0.561%   | 0.321%   |
| 0.062%     | 8           | 0.062%   | 0.036%   |

**D**

Scatter - 5003#4 iPSC - All Events

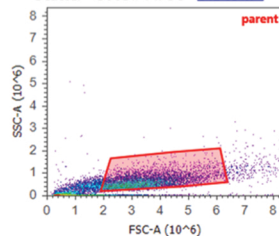

5003#4 iPSC - parent

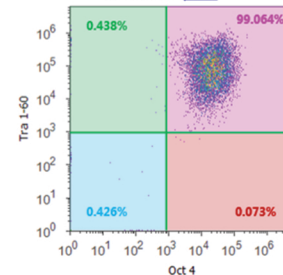

Experiment Name: iPSC Oct4&amp;Tra-1-60

Specimen Name: Specimen

Sample Name: 5003#4 iPSC

Showing 15,983 of 15,983 events.

| Name       | Event Count | % Parent | % Total  |
|------------|-------------|----------|----------|
| All Events | 15,983      | 100.000% | 100.000% |
| parent     | 8,224       | 51.455%  | 51.455%  |
| 0.438%     | 36          | 0.438%   | 0.225%   |
| 99.064%    | 8,147       | 99.064%  | 50.973%  |
| 0.426%     | 35          | 0.426%   | 0.219%   |
| 0.073%     | 6           | 0.073%   | 0.038%   |

**E**

| SUBJECT                   | OCT4+ & TRA-1-60+ (%) |
|---------------------------|-----------------------|
| Unrelated_Unaffected iPSC | 94.869                |
| Unaffected iPSC           | 97.705                |
| TD1 iPSC                  | 99.275                |
| TD2 iPSC                  | 99.064                |
