# Supplementary material
Source: PubMed Central journal article supplement (PMC5847395)
Supplement: NIHMS883218-supplement-15.pdf [file NIHMS883218-supplement-15.pdf]

**Table S1 Primers information**

| <b>Sanger sequencing</b> |                                                                     |                  |
|--------------------------|---------------------------------------------------------------------|------------------|
| PNKD-Seq-F               | 5'-GGTCACCAAAGGAATGGAGA-3'                                          |                  |
| PNKD-Seq-R               | 5'-AAGGGTCAGCCCTCTCTAGC-3'                                          |                  |
| PNKD transcript-F        | 5'-GCCACAGCTAACAAGGCTTC-3'                                          |                  |
| PNKD transcript-R        | 5'-TTCAATGGAAGCCTGCACAG-3'                                          |                  |
| <b>RT-qPCR</b>           |                                                                     |                  |
| PNKD(L)-F                | 5'-GCCACAGCTAACAAGGCTTC-3'                                          | Exon 2           |
| PNKD(L)-R                | 5'-GGCCTTTAGGGTAGCGATTC-3'                                          | Exon 5           |
| PNKD(M)-F                | 5'-GCTCCTCCTCGTCCTTGTC-3'                                           | Exon 4           |
| PNKD(M)-R                | 5'-AGGTACCCGAGCCAGGTG-3'                                            | Exon 5           |
| PNKD(S)-F                | 5'-CCTGGGCCATCGGCTT-3'                                              | Exon2 and Exon 3 |
| PNKD(S)-R                | 5'-GCTCTCATACTCGCCCGTGT-3'                                          | Exon 3           |
| RIMS1 $\alpha$ -F        | 5'-GCCATGCTCAAGTGTGTTGT-3'                                          |                  |
| RIMS1 $\alpha$ -R        | 5'-ATTCCACAAGTCGGAGCATC-3'                                          |                  |
| GAPDH-F                  | 5'-ACCACCAACTGCTTAGCACC-3'                                          |                  |
| GAPDH-R                  | 5'-ATGATGTTCTGGAGAGCCCC-3'                                          |                  |
| <b>Molecular Cloning</b> |                                                                     |                  |
| FLAG-PNKD-F              | 5'TCCCGATATCCCGATGGACTACAAAGACGATGACGACAAG AT GGCGGCGGTGGTAGCTGC-3' |                  |
| FLAG-PNKD-R              | 5'-TCTCCCCTCGAGTCACTTGCTCTTGTGCATATCCTTC-3'                         |                  |
| PNKD-Myc-F               | 5'-TCTCCCGATATCCCGATGGCGGCGGTGGTAGCTGC-3'                           |                  |
| PNKD-Myc-R               | 5'-CCTCGAGTTACAGATCCTCTTCTGAGATGAGTTTCTGCTCCTTGC TCTTGTGCATATCCT-3' |                  |
| LNCX_F                   | 5'-AGCTCGTTTAGTGAACCGTCAGATC-3'                                     |                  |
| BGH_R                    | 5'-TAGAAGGCACAGTCGAGG-3'                                            |                  |
