# Supplementary material
Source: PubMed Central journal article supplement (PMC5847395)
Supplement: NIHMS883218-supplement-16.pdf [file NIHMS883218-supplement-16.pdf]

**Table S2 Antibodies information**

| <b>Primary Antibodies</b>                                                                        | <b>Application</b>                                           | <b>Source</b>                                                                                                                             |
|--------------------------------------------------------------------------------------------------|--------------------------------------------------------------|-------------------------------------------------------------------------------------------------------------------------------------------|
| Nanog                                                                                            | ICC                                                          | EMD Millipore (MABD24)                                                                                                                    |
| Oct4                                                                                             | ICC                                                          | EMD Millipore (MAB4401)                                                                                                                   |
| Nestin                                                                                           | ICC                                                          | EMD Millipore (MAB5326)                                                                                                                   |
| Mushashi1                                                                                        | ICC                                                          | EMD Millipore (MABE268)                                                                                                                   |
| Class III $\beta$ Tubulin<br>(Mouse)                                                             | ICC                                                          | EMD Millipore (MMS-435P)                                                                                                                  |
| Class III $\beta$ Tubulin<br>(Rabbit)                                                            | ICC                                                          | Sigma (T2200)                                                                                                                             |
| MAP2                                                                                             | ICC                                                          | EMD Millipore (AB5622)                                                                                                                    |
| RIMS1                                                                                            | WB                                                           | Synaptic systems (140003)                                                                                                                 |
| Anti-DDDK tag antibody<br>[F-tag-01] – (Equivalent<br>to FLAG antibody from<br>Sigma)            | WB for co-IP<br>(PNKD (L) self-<br>oligomerization)          | Abcam<br>(ab18230)                                                                                                                        |
| Anti-FLAG M2 antibody                                                                            | WB for co-IP (RIMS1 $\alpha$<br>and PNKD (L)<br>Interaction) | Sigma (F3165)                                                                                                                             |
| Myc-Tag (9B11) Mouse<br>mAb                                                                      | WB<br>ICC                                                    | Cell Signaling Technology                                                                                                                 |
| Synapsin I                                                                                       | WB                                                           | Sigma (S193)                                                                                                                              |
| VGLUT1                                                                                           | ICC                                                          | Synaptic systems (135511)                                                                                                                 |
| VGAT                                                                                             | ICC                                                          | Synaptic systems (131011)                                                                                                                 |
| GFAP                                                                                             | ICC                                                          | Synaptic systems (173011)                                                                                                                 |
| GAPDH                                                                                            | WB                                                           | Abcam (ab9482)                                                                                                                            |
| OCT4                                                                                             | Flow Cytometry                                               | EMD Millipore (MAB4401)                                                                                                                   |
| TRA-1-60                                                                                         | Flow Cytometry                                               | EMD Millipore (MAB4360)                                                                                                                   |
| NESTIN Alexa Fluor 488                                                                           | Flow Cytometry                                               | eBioscience (53-9843-82)                                                                                                                  |
| SOX2 eFluor 660                                                                                  | Flow Cytometry                                               | eBioscience (50-9811-82)                                                                                                                  |
| MAP2 & Class III $\beta$<br>Tubulin                                                              | ICC in<br>electrophysiology                                  | Abcam(ab32454) (MAP2) & BioLegend<br>(801201) (Class III $\beta$ Tubulin)                                                                 |
| Pan-synapsin (E028) &<br>MAP2                                                                    | ICC in<br>electrophysiology                                  | <a href="http://www.informatics.jax.org/antibody/key/8034">http://www.informatics.jax.org/antibody/key/8034</a><br>& Sigma (M1406) (MAP2) |
| <b>Secondary Antibodies</b>                                                                      | <b>Application</b>                                           | <b>Source</b>                                                                                                                             |
| Cy3-conjugated<br>AffiniPure F(ab') <sub>2</sub><br>Fragment Goat Anti-<br>Mouse IgG (H+L)       | ICC                                                          | Jackson ImmunoResearch<br>(115-166-003)                                                                                                   |
| Goat anti-Rabbit IgG<br>(H+L) Superclonal<br>Secondary Antibody,<br>Alexa Fluor 488<br>conjugate | ICC                                                          | Thermo Fisher Scientific<br>(A27034)                                                                                                      |
| Goat anti-Mouse IgG1<br>Secondary Antibody, PE                                                   | Flow Cytometry                                               | ThermoFisher Scientific<br>(P21129)                                                                                                       |
| Goat anti-Mouse IgM<br>Heavy Chain Cross-<br>Adsorbed Secondary<br>Antibody, Alexa Fluor<br>488  | Flow Cytometry                                               | ThermoFisher Scientific<br>(A21042)                                                                                                       |
