# Supplementary material
Source: PubMed Central journal article supplement (PMC5847395)
Supplement: NIHMS883218-supplement-17.pdf [file NIHMS883218-supplement-17.pdf]

**Sequencing coverage and variant calls in each sample**

| <b>Sample ID</b> | <b>Total reads</b> | <b>Mean target coverage</b> | <b>Variants passed QC</b> |
|------------------|--------------------|-----------------------------|---------------------------|
| <b>4001</b>      | 62,135,534         | 50.2                        | 200,298                   |
| <b>4002</b>      | 66,022,486         | 49.7                        | 215,897                   |
| <b>5001</b>      | 87,865,300         | 64.3                        | 264,505                   |
| <b>5003</b>      | 70,384,372         | 58.6                        | 232,068                   |
| <b>5004</b>      | 61,150,770         | 43.4                        | 205,672                   |
| <b>5005</b>      | 65,183,680         | 51.5                        | 223,182                   |
