# Supplementary material
Source: PubMed Central journal article supplement (PMC5847395)
Supplement: NIHMS883218-supplement-18.pdf [file NIHMS883218-supplement-18.pdf]

## Column Definition

|                    |                                                                                                                                                                                                                                                                                                    |
|--------------------|----------------------------------------------------------------------------------------------------------------------------------------------------------------------------------------------------------------------------------------------------------------------------------------------------|
| <b>Rank</b>        | Rank of the gene                                                                                                                                                                                                                                                                                   |
| <b>Gene</b>        | Gene Id                                                                                                                                                                                                                                                                                            |
| <b>FullName</b>    | Full Name of the gene                                                                                                                                                                                                                                                                              |
| <b>Pathway</b>     | Known Pathway Associated with the Gene                                                                                                                                                                                                                                                             |
| <b>mRNA</b>        | Transcript ID                                                                                                                                                                                                                                                                                      |
| <b>Chr</b>         | Chromosome                                                                                                                                                                                                                                                                                         |
| <b>Score</b>       | VAAST score of the transcript                                                                                                                                                                                                                                                                      |
| <b>PValue</b>      | VAAST p-value of the transcript                                                                                                                                                                                                                                                                    |
| <b>LOD_Score</b>   | VAAST LOD score of the transcript                                                                                                                                                                                                                                                                  |
| <b>LOD_pValue</b>  | VAAST LOD score p-value of the transcript                                                                                                                                                                                                                                                          |
| <b>Strand</b>      | Transcript Strand                                                                                                                                                                                                                                                                                  |
| <b>#ofVar</b>      | Total number of variants in the transcript                                                                                                                                                                                                                                                         |
| <b>VarType</b>     | Type of the variant. SNVs is labeled as either "TU" or "TR". If a target variant is observed in background genomes, it is labeled "TR" (for "target"); otherwise if a variant is only observed in target genomes, it is labeled "TU" (for "target unique").                                        |
| <b>VarScore</b>    | Score of each variant, the sum roughly equals the transcript score ("Score") in column 8.                                                                                                                                                                                                          |
| <b>VarLODScore</b> | VAAST LOD score of each variant                                                                                                                                                                                                                                                                    |
| <b>VarPosition</b> | The chromosomal position of each variant                                                                                                                                                                                                                                                           |
| <b>AlleleCount</b> | Number of individuals in the background file containing a variant if the variant is not unique to the targets.                                                                                                                                                                                     |
| <b>Ref</b>         | Reference nucleotide and amino-acid allele                                                                                                                                                                                                                                                         |
| <b>GenoType</b>    | Individual genotypes following the VAAST output format. Please see the "VAAST Output" section of the VAAST users guide ( <a href="http://www.yandell-lab.org/software/VAAST/VAAST_Users_Guide.pdf">http://www.yandell-lab.org/software/VAAST/VAAST_Users_Guide.pdf</a> ) for detailed description. |

## Commands

### Command - dominant

```
VAAST -gw 1e7 -m pvaast --indel --codon_bias --splice_site --fast_gp -pv_control TS0011_d.ctl -l phastcons-hg19-vertebrate.txt -o TS0011_d refGene_hg19.gff3 1kg-cgi-427_gene_only.cdr
```

### Control File - dominant (TS0011\_d.ctl)

```
#----- Basic options-----
```

```
input_ped_cdr_files:          TS0011.ped TS0011.cdr
pedigree_representatives:    3
unknown_representatives:    yes
additional_cases:
inheritance_model:           dominant
```

```
#----- Performance Tuning -----
```

```
informative_site_selection:  3
simulate_genotyping_error:   yes
genotyping_error_rate:       1.00E-04
penetrance_lower_bound:      0.6
penetrance_upper_bound:      1
```

```
#----- Gene and Variant Filtering -----
```

```
max_prevalence_filter:       0.01
lod_score_filter:            yes
clr_score_filter:            no
nocall_filter:               yes
nocall_filter_cutoff:        2
inheritance_error_filter:     yes
```

### Command - recessive

```
VAAST -gw 1e7 -m pvaast --indel --codon_bias --splice_site --fast_gp -pv_control TS0011_r.ctl -l phastcons-hg19-vertebrate.txt -o TS0011_r refGene_hg19.gff3 1kg-cgi-427_gene_only.cdr
```

### Control File - recessive (TS0011\_r.ctl)

```
#----- Basic options-----
```

```
input_ped_cdr_files:          TS0011.ped TS0011.cdr
pedigree_representatives:    3
unknown_representatives:    yes
additional_cases:
inheritance_model:           recessive
```

```
#----- Performance Tuning -----
```

```
informative_site_selection:  3
simulate_genotyping_error:   yes
genotyping_error_rate:       1.00E-04
penetrance_lower_bound:      0.6
penetrance_upper_bound:      1
```

```
#----- Gene and Variant Filtering -----
```

```
max_prevalence_filter:       0.01
lod_score_filter:            yes
clr_score_filter:            no
nocall_filter:               yes
nocall_filter_cutoff:        2
inheritance_error_filter:     yes
```





|     |              |                                                                                                                                                                                                                                                                                                                      |              |       |       |          |   |   |     |       |        |           |    |        |                                            |
|-----|--------------|----------------------------------------------------------------------------------------------------------------------------------------------------------------------------------------------------------------------------------------------------------------------------------------------------------------------|--------------|-------|-------|----------|---|---|-----|-------|--------|-----------|----|--------|--------------------------------------------|
| 81  | SLC29A3      | phenylalanyl-tRNA synthetase alpha subunit (FARSA) mRNA. Homo sapiens solute carrier family 29 (nucleoside transporters) member 3 (SLC29A3) transcript variant 1 mRNA. Homo sapiens short chain dehydrogenase/reductase family 39U member 1 (SDR39U1) mRNA. Homo sapiens armadillo repeat containing 9 (ARMC9) mRNA. | NM_001174098 | chr10 | 6.03  | 5.00E-03 | + | 1 | SNP | 5.98  | 0 0.01 | 73115942  | NA | G V    | N 0-5 A:A H:H                              |
| 82  | SDR39U1      | Homo sapiens short chain dehydrogenase/reductase family 39U member 1 (SDR39U1) mRNA.                                                                                                                                                                                                                                 | NM_020195    | chr14 | 9.58  | 5.00E-03 | - | 1 | SNP | 9.53  | 0 0.01 | 24910973  | NA | T I    | N 0-5 G:G L:L                              |
| 83  | ARMC9        | Homo sapiens armadillo repeat containing 9 (ARMC9) mRNA.                                                                                                                                                                                                                                                             | NM_025139    | chr2  | 12.88 | 6.00E-03 | + | 1 | SNP | 12.83 | 0 0.01 | 232087475 | NA | T I    | N 0-5 A:A K:K                              |
| 84  | CACNA1C      | Homo sapiens calcium channel voltage-dependent L type alpha 1C subunit (CACNA1C) transcript variant 1 mRNA. Homo sapiens keratin associated protein 12-2 (KRTAP12-2) mRNA. Homo sapiens ataxin 3 (ATXN3) transcript variant h mRNA.                                                                                  | NM_001129830 | chr12 | 9.6   | 6.00E-03 | + | 1 | SNP | 9.55  | 0 0.01 | 2791130   | NA | C P    | N 0-5 T:T L:L                              |
| 85  | KRTAP12-2    | Homo sapiens keratin associated protein 12-2 (KRTAP12-2) mRNA.                                                                                                                                                                                                                                                       | NM_181684    | chr21 | 8.2   | 6.00E-03 | - | 1 | SNP | 8.15  | 0 0.01 | 46086758  | NA | C A    | N 0 T:C T:A;N 1-5 T:T T:T                  |
| 86  | ATXN3_DUP_01 | Homo sapiens ataxin 3 (ATXN3) transcript variant h mRNA.                                                                                                                                                                                                                                                             | NM_001164778 | chr14 | 4.8   | 6.00E-03 | - | 1 | SNP | 4.75  | 0 0.01 | 92537354  | NA | C G    | N 0-5 G:G R:R                              |
| 87  | TMCO4        | Homo sapiens transmembrane and coiled-coil domains 4 (TMCO4) mRNA. Homo sapiens enoyl CoA hydratase short chain 1 mitochondrial (ECHS1) nuclear gene encoding mitochondrial protein mRNA.                                                                                                                            | NM_181719    | chr1  | 9.28  | 6.00E-03 | - | 1 | SNP | 9.23  | 0 0.01 | 20020994  | NA | C R    | N 0,2-4 T:C H:R;N 1,5 T:T H:H              |
| 88  | ECHS1        | Homo sapiens enoyl CoA hydratase short chain 1 mitochondrial (ECHS1) nuclear gene encoding mitochondrial protein mRNA.                                                                                                                                                                                               | NM_004092    | chr10 | 0.71  | 6.00E-03 | - | 1 | SNP | 0.66  | 0 0.01 | 135186806 | 1  | A V    | B 1-5 A:G V:A;N 0 G:G A:A                  |
| 89  | ZNF844       | Homo sapiens zinc finger protein 844 (ZNF844) mRNA.                                                                                                                                                                                                                                                                  | NM_001136501 | chr19 | 11.21 | 6.00E-03 | + | 1 | SNP | 5.72  | 0 1.19 | 12186921  | NA | T V    | N 0,2-5 T:C V:A                            |
| 90  | FZD5         | Homo sapiens frizzled family receptor 5 (FZD5) mRNA. Homo sapiens MUS81 endonuclease homolog (S. cerevisiae) (MUS81) mRNA.                                                                                                                                                                                           | NM_003468    | chr2  | 7.7   | 6.00E-03 | - | 1 | SNP | 5.76  | 0 0.42 | 208632817 | 10 | G P    | B 0,2-5 A:G L:P                            |
| 91  | MUS81        | Homo sapiens frizzled family receptor 5 (FZD5) mRNA.                                                                                                                                                                                                                                                                 | NM_025128    | chr11 | 10.08 | 6.00E-03 | + | 1 | SNP | 10.03 | 0 0.01 | 65629934  | NA | G R    | N 1,3-5 C:C P:P;N 0,2 C:G P:R              |
| 92  | MAP3K4       | Homo sapiens mitogen-activated protein kinase kinase kinase 4 (MAP3K4) transcript variant 2 mRNA. Homo sapiens chromosome 9 open reading frame 150 (C9orf150) mRNA. Homo sapiens zinc finger and AT hook domain containing (ZFAT) transcript variant 5 mRNA.                                                         | NM_005922    | chr6  | 13.52 | 6.00E-03 | + | 1 | del | 13.47 | 0 0.01 | 161519351 | NA | CTG PA | 0-5 :- :-                                  |
| 93  | C9orf150     | Homo sapiens mitogen-activated protein kinase kinase kinase 4 (MAP3K4) transcript variant 2 mRNA.                                                                                                                                                                                                                    | NM_203403    | chr9  | 12.4  | 6.00E-03 | + | 1 | ins | 12.34 | 0 0.01 | 12775861  | NA | - G    | 0-1,3-5 GGCGCGGC:GGCGCGGC GGG:GGG;2 ^: ^ ^ |
| 94  | ZFAT         | Homo sapiens zinc finger and AT hook domain containing (ZFAT) transcript variant 5 mRNA.                                                                                                                                                                                                                             | NM_020863    | chr8  | 10.3  | 6.00E-03 | - | 1 | SNP | 4.81  | 0 1.19 | 135614326 | 7  | G R    | B 0,2-5 A:G W:R                            |
| 95  | F2RL3        | Homo sapiens coagulation factor II (thrombin) receptor-like 3 (F2RL3) mRNA. Homo sapiens zinc finger protein 778 (ZNF778) transcript variant 2 mRNA.                                                                                                                                                                 | NM_003950    | chr19 | 9.81  | 6.00E-03 | + | 1 | SNP | 4.31  | 0 1.19 | 17001203  | 5  | C P    | B 0,2-5 T:C L:P                            |
| 96  | ZNF778       | Homo sapiens zinc finger protein 778 (ZNF778) transcript variant 2 mRNA.                                                                                                                                                                                                                                             | NM_001201407 | chr16 | 17.41 | 6.00E-03 | + | 1 | ins | 17.36 | 0 0.01 | 89291210  | NA | - -    | 0-5 GTGA:GTGA VM:VM                        |
| 97  | GAK          | Homo sapiens cyclin G associated kinase (GAK) mRNA.                                                                                                                                                                                                                                                                  | NM_005255    | chr4  | 12.25 | 6.00E-03 | - | 1 | SNP | 6.76  | 0 1.19 | 862363    | 4  | C D    | B 0,2-5 A:C Y:D                            |
| 98  | BTNL2_DUP_07 | Homo sapiens butyrophilin-like 2 (MHC class II associated) (BTNL2) mRNA.                                                                                                                                                                                                                                             | NM_019602    | chr6  | 10.69 | 6.00E-03 | - | 1 | SNP | 10.64 | 0 0.01 | 32362703  | NA | G P    | N 0-1,3-5 T:G Q:P;N 2 T:T Q:Q              |
| 99  | MPP2         | Homo sapiens membrane protein palmitoylated 2 (MAGUK p55 subfamily member 2) (MPP2) mRNA. Homo sapiens v-maf musculoaponeurotic fibrosarcoma oncogene homolog A (avian) (MAFA) mRNA.                                                                                                                                 | NM_005374    | chr17 | 10.01 | 6.00E-03 | - | 1 | SNP | 9.96  | 0 0.01 | 41960633  | NA | C V    | N 0-5 G:G L:L                              |
| 100 | MAFA         | Homo sapiens membrane protein palmitoylated 2 (MAGUK p55 subfamily member 2) (MPP2) mRNA.                                                                                                                                                                                                                            | NM_201589    | chr8  | 7.76  | 6.00E-03 | - | 1 | del | 7.71  | 0 0.01 | 144511954 | NA | TGG HH | 0-5 :- :-                                  |
| 101 | LSG1         | Homo sapiens large subunit GTPase 1 homolog (S. cerevisiae) (LSG1) mRNA. Homo sapiens mutated in colorectal cancers (MCC) transcript variant 2 mRNA.                                                                                                                                                                 | NM_018385    | chr3  | 8.54  | 7.00E-03 | - | 1 | SNP | 8.49  | 0 0.01 | 194373832 | NA | T X    | N 0-5 C:C E:E                              |
| 102 | MCC          | Homo sapiens mutated in colorectal cancers (MCC) transcript variant 2 mRNA.                                                                                                                                                                                                                                          | NM_001085377 | chr5  | 12.92 | 7.00E-03 | - | 1 | ins | 12.86 | 0 0.01 | 112824048 | NA | - S    | 0,2-3 :-GCC :-G;1,4-5 GCC:GCC G:G          |
| 103 | DLC1         | Homo sapiens deleted in liver cancer 1 (DLC1) transcript variant 3 mRNA.                                                                                                                                                                                                                                             | NM_024767    | chr8  | 6.93  | 7.00E-03 | - | 1 | SNP | 6.88  | 0 0.01 | 13356819  | NA | T Q    | N 0-5 G:G H:H                              |
| 104 | MUC6         | Homo sapiens mucin 6 oligomeric mucus/gel-forming (MUC6) mRNA. Homo sapiens protocadherin alpha subfamily C 2 (PCDHAC2) transcript variant 2 mRNA.                                                                                                                                                                   | NM_005961    | chr11 | 13.74 | 7.00E-03 | - | 1 | SNP | 8.25  | 0 1.19 | 1017691   | NA | C A    | N 0,2-5 C:G A:P                            |
| 105 | PCDHAC1      | Homo sapiens protocadherin alpha subfamily C 2 (PCDHAC2) transcript variant 2 mRNA.                                                                                                                                                                                                                                  | NM_014005    | chr5  | 13.65 | 7.00E-03 | + | 1 | SNP | 8.16  | 0 1.19 | 140230371 | NA | A K    | N 2-5 A:C K:T;N 0 C:C T:T                  |
| 106 | ISCU         | Homo sapiens iron-sulfur cluster scaffold homolog (E. coli) (ISCU) nuclear gene encoding mitochondrial protein transcript variant 2 mRNA.                                                                                                                                                                            | NM_213595    | chr12 | 13.48 | 7.00E-03 | + | 1 | SNP | 13.43 | 0 0.01 | 108956418 | NA | T F    | N 0-5 G:G C:C                              |
| 107 | RNF169       | Homo sapiens ring finger protein 169 (RNF169) mRNA. Homo sapiens family with sequence similarity 135 member B (FAM135B) mRNA.                                                                                                                                                                                        | NM_001098638 | chr11 | 9.99  | 7.00E-03 | + | 1 | SNP | 4.5   | 0 1.19 | 74460148  | 8  | C P    | B 2-5 T:C S:P;N 0 T:T S:S                  |
| 108 | FAM135B      | Homo sapiens family with sequence similarity 135 member B (FAM135B) mRNA.                                                                                                                                                                                                                                            | NM_015912    | chr8  | 9.55  | 8.00E-03 | - | 1 | SNP | 9.5   | 0 0.01 | 139165273 | NA | G P    | N 0,4 A:A L:L;N 1-3,5 A:G L:P              |
| 109 | POTEF        | Homo sapiens POTE ankyrin domain family member F (POTEF) mRNA. Homo sapiens piccolo (presynaptic cytomatrix protein) (PCLO) transcript variant 2 mRNA.                                                                                                                                                               | NM_001099771 | chr2  | 9.94  | 8.00E-03 | - | 1 | SNP | 9.89  | 0 0.01 | 130832292 | NA | T V    | N 1,3-5 A:A F:F;N 0,2 A:T F:Y              |
| 110 | PCLO         | Homo sapiens piccolo (presynaptic cytomatrix protein) (PCLO) transcript variant 2 mRNA.                                                                                                                                                                                                                              | NM_014510    | chr7  | 17.41 | 9.00E-03 | - | 1 | ins | 17.36 | 0 0.01 | 82581488  | NA | - -    | 0-5 TCA:TCA *:*                            |
| 111 | LAMA4        | Homo sapiens laminin alpha 4 (LAMA4) transcript variant 5 mRNA. Homo sapiens interferon regulatory factor 2 binding protein-like (IRF2BP1) mRNA.                                                                                                                                                                     | NM_001105206 | chr6  | 12.82 | 9.00E-03 | - | 1 | SNP | 12.77 | 0 0.01 | 112508770 | NA | G A    | N 0-5 T:T E:E                              |
| 112 | IRF2BP1      | Homo sapiens interferon regulatory factor 2 binding protein-like (IRF2BP1) mRNA.                                                                                                                                                                                                                                     | NM_024496    | chr14 | 13.52 | 9.00E-03 | - | 1 | del | 13.47 | 0 0.01 | 77493792  | NA | TGT QQ | 0-5 :- :-                                  |
| 113 | MICAL1       | Homo sapiens microtubule associated monooxygenase calponin and LIM domain containing 1 (MICAL1) transcript variant 1 mRNA. Homo sapiens phosphatidylinositol glycan anchor biosynthesis class Q (PIGQ) transcript variant 2 mRNA.                                                                                    | NM_001159291 | chr6  | 8.2   | 9.00E-03 | - | 1 | SNP | 8.15  | 0 0.01 | 109767931 | NA | C A    | N 1-2,5 T:C T:A;N 0,3-4 T:T T:T            |
| 114 | PIGQ         | Homo sapiens microtubule associated monooxygenase calponin and LIM domain containing 1 (MICAL1) transcript variant 1 mRNA.                                                                                                                                                                                           | NM_148920    | chr16 | 9.52  | 9.00E-03 | + | 1 | SNP | 9.47  | 0 0.01 | 633354    | NA | G C    | N 2-4 A:A Y:Y;N 0-1,5 A:G Y:C              |

|     |                 |                                                                                                               |                                                                 |              |       |       |          |   |   |     |       |        |           |    |                     |     |                                                                                                                                                                                           |                                 |
|-----|-----------------|---------------------------------------------------------------------------------------------------------------|-----------------------------------------------------------------|--------------|-------|-------|----------|---|---|-----|-------|--------|-----------|----|---------------------|-----|-------------------------------------------------------------------------------------------------------------------------------------------------------------------------------------------|---------------------------------|
| 115 | TMEM44          | Homo sapiens transmembrane protein 44 (TMEM44) transcript variant 1 mRNA.                                     |                                                                 | NM_001166305 | chr3  | 7.06  | 9.00E-03 | - | 1 | SNP | 7.01  | 0 0.01 | 194338424 | NA | G R                 |     | N 2-3 C C G;G;N 0-1,4-5 C;G G;R                                                                                                                                                           |                                 |
| 116 | CUL7            | Homo sapiens cullin 7 (CUL7) transcript variant 2 mRNA.                                                       |                                                                 | NM_014780    | chr6  | 8.57  | 9.00E-03 | - | 1 | SNP | 8.52  | 0 0.01 | 43014299  | NA | T Q                 |     | N 0-5 C C R;R                                                                                                                                                                             |                                 |
| 117 | TMEM184A        | Homo sapiens transmembrane protein 184A (TMEM184A) mRNA.                                                      |                                                                 | NM_001097620 | chr7  | 12.18 | 1.00E-02 | - | 1 | ins | 12.13 | 0 0.01 | 1586653   | NA | - -                 |     | 1-2,4 :-GCC :-G;0,3,5 GCC:GCC G;G                                                                                                                                                         |                                 |
| 118 | PCM1            | Homo sapiens pericentriolar material 1 (PCM1) mRNA.                                                           |                                                                 | NM_006197    | chr8  | 10.22 | 1.00E-02 | + | 1 | SNP | 10.17 | 0 0.01 | 17796382  | NA | A N                 |     | N 1-5 A;G N;S;N 0 G;G S;S                                                                                                                                                                 |                                 |
| 119 | SPAG17          | Homo sapiens sperm associated antigen 17 (SPAG17) mRNA.                                                       |                                                                 | NM_206996    | chr1  | 12.06 | 1.00E-02 | - | 1 | SNP | 6.57  | 0 1.19 | 118644480 | NA | G P                 |     | N 0,2-5 C;G A;P                                                                                                                                                                           |                                 |
| 120 | KRTAP10-2       | Homo sapiens keratin associated protein 10-2 (KRTAP10-2) mRNA.                                                |                                                                 | NM_198693    | chr21 | 14.62 | 1.00E-02 | - | 1 | del | 9.12  | 0 1.19 | 45970760  | NA | CTTGACGACAGAG PVCKK |     | 0,2-5 :-CTTGACGACAGAG :-PVCKK                                                                                                                                                             |                                 |
| 121 | CPS1            | Homo sapiens carbamoyl-phosphate synthase 1 mitochondrial (CPS1) transcript variant 3 mRNA.                   |                                                                 | NM_001122633 | chr2  | 7.76  | 1.00E-02 | + | 1 | SNP | 7.71  | 0 0.01 | 211456637 | NA | A T                 |     | N 1-5 A;G T;A;N 0 G;G A;A                                                                                                                                                                 |                                 |
| 122 | RNF212          | Homo sapiens ring finger protein 212 (RNF212) transcript variant 3 mRNA.                                      |                                                                 | NM_001193318 | chr4  | 17.41 | 1.00E-02 | - | 1 | ins | 17.36 | 0 0.01 | 1087327   | NA | - -                 |     | 1 CTGCCAGGCTAGAGCCAGCC:CTGCCAGGCTAGAGCCAGCC GWL*PGQ;GWL*PGQ;0,2-4 CTGCCAGGCTGGAGCCAGCC:CTGCCAGGCTGGAGCCAGCC GWLQPGQ;GWLQPGQ;5 CTGTCCAGGCTGGAGCCAGCC:CTGTCCAGGCTGGAGCCAGCC GWLQPGQ;GWLQPGQ |                                 |
| 123 | FMNL1           | Homo sapiens formin-like 1 (FMNL1) mRNA.                                                                      |                                                                 | NM_005892    | chr17 | 6.63  | 1.00E-02 | + | 1 | SNP | 6.58  | 0 0.01 | 43318779  | NA | C P                 |     | N 0-5 G;G A;A                                                                                                                                                                             |                                 |
| 124 | TCF15           | Homo sapiens transcription factor 15 (basic helix-loop-helix) (TCF15) mRNA.                                   | Transcription Factor                                            | NM_004609    | chr20 | 10.03 | 1.00E-02 | - | 1 | SNP | 9.98  | 0 0.01 | 590542    | NA | C V                 |     | N 0-5 G;G L;L                                                                                                                                                                             |                                 |
| 125 | RAB11FIP1       | Homo sapiens RAB11 family interacting protein 1 (class I) (RAB11FIP1) transcript variant 1 mRNA.              |                                                                 | NM_025151    | chr8  | 6.69  | 1.00E-02 | - | 1 | SNP | 6.64  | 0 0.01 | 37728017  |    | 3                   | A M |                                                                                                                                                                                           | B 0,3,5 A;G M;T;B 1-2,4 G;G T;T |
| 126 | MLL3            | Homo sapiens myeloid/lymphoid or mixed-lineage leukemia 3 (MLL3) mRNA.                                        |                                                                 | NM_170606    | chr7  | 13.61 | 1.00E-02 | - | 1 | ins | 13.55 | 0 0.01 | 151945071 | NA | - Y                 |     | 0-5 :-T :-N                                                                                                                                                                               |                                 |
| 127 | OAS3            | Homo sapiens 2',5'-oligoadenylate synthetase 3 100kDa (OAS3) mRNA.                                            |                                                                 | NM_006187    | chr12 | 3.87  | 1.00E-02 | + | 1 | SNP | 3.82  | 0 0.01 | 113388598 |    | 5                   | G R |                                                                                                                                                                                           | N 4 A;A H;H;B 0-3,5 A;G H;R     |
| 128 | ZDBF2           | Homo sapiens zinc finger DBF-type containing 2 (ZDBF2) mRNA.                                                  |                                                                 | NM_020923    | chr2  | 7.91  | 1.00E-02 | + | 1 | SNP | 4.64  | 0 0.71 | 207173390 |    | 9                   | G E |                                                                                                                                                                                           | B 0,2-5 A;G K;E                 |
| 129 | KRTAP9-1        | Homo sapiens keratin associated protein 9-1 (KRTAP9-1) mRNA.                                                  |                                                                 | NM_001190460 | chr17 | 13.52 | 1.00E-02 | + | 1 | del | 13.47 | 0 0.01 | 39346593  | NA | CCT TC              |     | 0-5 :-CCT :-TC                                                                                                                                                                            |                                 |
| 130 | NLRP6           | Homo sapiens NLR family pyrin domain containing 6 (NLRP6) mRNA.                                               |                                                                 | NM_138329    | chr11 | 7.55  | 1.00E-02 | + | 1 | SNP | 7.5   | 0 0.01 | 280816    | NA | A Y                 |     | N 1 A;T Y;F;N 0,2-5 T;T F;F                                                                                                                                                               |                                 |
| 131 | FANCM           | Homo sapiens Fanconi anemia complementation group M (FANCM) mRNA.                                             |                                                                 | NM_020937    | chr14 | 8.55  | 1.00E-02 | + | 1 | SNP | 3.06  | 0 1.19 | 45636328  |    | 7                   | A N |                                                                                                                                                                                           | B 0,2-5 A;G N;S                 |
| 132 | TELO2           | Homo sapiens telomere maintenance 2 homolog (S. cerevisiae) (TELO2) mRNA.                                     |                                                                 | NM_016111    | chr16 | 7.42  | 2.00E-02 | + | 1 | SNP | 7.37  | 0 0.01 | 1544302   | NA | A E                 |     | N 0-4 A;G E;G;N 5 G;G G;G                                                                                                                                                                 |                                 |
| 133 | NCOR2           | Homo sapiens nuclear receptor corepressor 2 (NCOR2) transcript variant 1 mRNA.                                | Transcription Factor;Huntington Disease;Notch Signaling Pathway | NM_001206654 | chr12 | 12.18 | 2.00E-02 | - | 1 | ins | 12.13 | 0 0.01 | 124887058 | NA | - -                 |     | 0-5 GCT:GCT S;S                                                                                                                                                                           |                                 |
| 134 | PSD3            | Homo sapiens pleckstrin and Sec7 domain containing 3 (PSD3) transcript variant 2 mRNA.                        |                                                                 | NM_015310    | chr8  | 9.53  | 2.00E-02 | - | 1 | SNP | 9.48  | 0 0.01 | 18729817  | NA | G T                 |     | N 0-5 A;A M;M                                                                                                                                                                             |                                 |
| 135 | COL24A1         | Homo sapiens collagen type XXIV alpha 1 (COL24A1) mRNA.                                                       |                                                                 | NM_152890    | chr1  | 3.86  | 3.00E-02 | - | 1 | SNP | 3.81  | 0 0.01 | 86591837  |    | 207                 | G A |                                                                                                                                                                                           | B 0,3,5 A;A V;V;B 1-2,4 A;G V;A |
| 136 | SCARF2          | Homo sapiens scavenger receptor class F member 2 (SCARF2) transcript variant 2 mRNA.                          |                                                                 | NM_182895    | chr22 | 10.03 | 3.00E-02 | - | 1 | SNP | 9.98  | 0 0.01 | 20779946  | NA | C V                 |     | N 0-5 G;G L;L                                                                                                                                                                             |                                 |
| 137 | DNAH17          | Homo sapiens dynein axonemal heavy chain 17 (DNAH17) mRNA.                                                    | Huntington Disease                                              | NM_173628    | chr17 | 9.87  | 3.00E-02 | - | 1 | SNP | 9.82  | 0 0.01 | 76491127  | NA | T M                 |     | N 1,4 C C V;V;N 0,2-3,5 T;C M;V                                                                                                                                                           |                                 |
| 138 | PLIN4           | Homo sapiens perilipin 4 (PLIN4) mRNA.                                                                        |                                                                 | NM_001080400 | chr19 | 8.59  | 3.00E-02 | - | 1 | SNP | 8.54  | 0 0.01 | 4511453   | NA | G A                 |     | N 0-5 A;A V;V                                                                                                                                                                             |                                 |
| 139 | RNF213          | Homo sapiens ring finger protein 213 (RNF213) transcript variant 2 mRNA.                                      |                                                                 | NM_020914    | chr17 | 2.76  | 3.00E-02 | + | 1 | SNP | 2.71  | 0 0.01 | 78346870  |    | 6                   | C L |                                                                                                                                                                                           | B 0-5 A;C I;L                   |
| 140 | OBSCN           | Homo sapiens obscurin cytoskeletal calmodulin and titin-interacting RhoGEF (OBSCN) transcript variant 1 mRNA. |                                                                 | NM_052843    | chr1  | 10.77 | 3.00E-02 | + | 1 | SNP | 10.72 | 0 0.01 | 228412228 | NA | G A                 |     | N 4 A;A T;T;N 0-3,5 A;G T;A                                                                                                                                                               |                                 |
| 141 | KRTAP10-7       | Homo sapiens keratin associated protein 10-7 (KRTAP10-7) mRNA.                                                |                                                                 | NM_198689    | chr21 | 0.47  | 4.00E-02 | + | 1 | SNP | 0.42  | 0 0.01 | 46020867  |    | 2                   | A M |                                                                                                                                                                                           | B 0-5 G;G V;V                   |
| 142 | EPPK1           | Homo sapiens epiplakin 1 (EPPK1) mRNA.                                                                        |                                                                 | NM_031308    | chr8  | 11.81 | 4.00E-02 | - | 1 | SNP | 6.3   | 0 1.19 | 144940779 |    | 2                   | G R |                                                                                                                                                                                           | B 0,2-5 A;G C;R                 |
| 143 | MUC16           | Homo sapiens mucin 16 cell surface associated (MUC16) mRNA.                                                   |                                                                 | NM_024690    | chr19 | 6.77  | 5.00E-02 | - | 1 | SNP | 6.72  | 0 0.01 | 9001833   | NA | A M                 |     | N 0-5 G;G T;T                                                                                                                                                                             |                                 |
| 144 | HLA-DQB1_DUP_02 | Homo sapiens HLA-DQB1 transcript variant 1 mRNA.                                                              |                                                                 | NM_002123    | chr6  | 2.58  | 5.00E-02 | - | 1 | SNP | 2.53  | 0 0.01 | 32632745  |    | 4                   | G A |                                                                                                                                                                                           | B 0,2,4 A;A V;V;B 1,3,5 A;G V;A |
| 145 | DSP             | Homo sapiens desmoplakin (DSP) transcript variant 1 mRNA.                                                     |                                                                 | NM_004415    | chr6  | 0.28  | 1.00E+00 | + | 1 | SNP | 13.77 | 0 0.00 | 7582993   | NA | A E                 |     | N 1,3,5 A;T E;V                                                                                                                                                                           |                                 |

## Recessive model

| Rank | Gene         | FullName                                                                                                      | Pathway | mRNA         | Chr  | Score | PValue   | LOD_Score | LOD_PValue | Strand | #ofVariants | VarType | VarScore | VarLODScore        | VarPosition | AlleleCount | Ref | GenoType            |                             |
|------|--------------|---------------------------------------------------------------------------------------------------------------|---------|--------------|------|-------|----------|-----------|------------|--------|-------------|---------|----------|--------------------|-------------|-------------|-----|---------------------|-----------------------------|
| 1    | C4orf48      | Homo sapiens chromosome 4 open reading frame 48 (C4orf48) transcript variant 2 mRNA.                          |         | NM_001141936 | chr4 | 32.38 | 9.00E-07 | 1.6       | 9.00E-07   | +      | 1           | SNP     | 25       | 0 1.60361112696843 | 2044128     | NA          | C P | N 0-5 T;T L;L       |                             |
| 2    | GPRIN1       | Homo sapiens G protein regulated inducer of neurite outgrowth 1 (GPRIN1) mRNA.                                |         | NM_052899    | chr5 | 44.11 | 2.00E-06 | 1.6       | 4.00E-04   | -      | 2           | del     | 19.3743  | 0 1.60361112696843 | 17602612    | 6           | NA  | CCTCCTTCCTC PRKED   | 0-5 :-CCTCCTTCCTC :-PRKED   |
| 3    | SEPT9        | Homo sapiens septin 9 (SEPT9) transcript variant 4 mRNA.                                                      |         | NM_001113492 | chr1 | 29.05 | 3.00E-06 | 1.6       | 3.00E-06   | +      | 1           | SNP     | 21.6743  | 0 1.60361112696843 | 75494705    | 2           | NA  | CAAAGACCCAGGA DPGSL | 0-5 :-CAAAGACCCAGGA :-DPGSL |
| 4    | KIAA0040     | Homo sapiens KIAA0040 (KIAA0040) transcript variant 2 mRNA.                                                   |         | NM_001162893 | chr1 | 49.5  | 3.00E-06 | 2.77      | 2.00E-05   | -      | 2           | del     | 19.3784  | 0 2.78390360357584 | 17512994    | 8           | NA  | TCTCTTG NKKK        | 0-5 :-TCTCTTG :-NKKK        |
| 5    | ATXN3_DUP_01 | Homo sapiens ataxin 3 (ATXN3) transcript variant h mRNA.                                                      |         | NM_001164774 | chr1 | 24.09 | 9.00E-06 | 1.6       | 1.00E-05   | -      | 1           | SNP     | 16.7143  | 0 1.60361112696843 | 92537354    | 6           | NA  | C K                 | 0-5 :-C :-K                 |
| 6    | SLC29A3      | Homo sapiens solute carrier family 29 (nucleoside transporters) member 3 (SLC29A3) transcript variant 1 mRNA. |         | NM_001174098 | chr1 | 28.85 | 1.00E-05 | 1.6       | 2.00E-05   | +      | 1           | SNP     | 21.4743  | 0 1.60361112696843 | 73115942    | 4           | NA  | G V                 | N 0-5 A;A I;I               |
| 7    | GPATCH4      | Homo sapiens G patch domain containing 4 (GPATCH4) transcript variant 2 mRNA.                                 |         | NM_182679    | chr1 | 40.24 | 1.00E-05 | 1.6       | 2.00E-05   | -      | 1           | ins     | 32.8643  | 0 1.60361112696843 | 15656504    | 9           | NA  | - -                 | 0-5 AC AC V;V               |
| 8    | IRF2BPL      | Homo sapiens interferon regulatory factor 2 binding protein-like (IRF2BPL) mRNA.                              |         | NM_024496    | chr1 | 36.34 | 3.00E-05 | 1.6       | 4.00E-05   | -      | 1           | del     | 28.9743  | 0 1.60361112696843 | 77493792    | 4           | NA  | TGT QQ              | 0-5 :- :-                   |
| 9    | PTGFRN       | Homo sapiens prostaglandin F2 receptor negative regulator (PTGFRN) mRNA.                                      |         | NM_020440    | chr1 | 31.83 | 3.00E-05 | 1.6       | 9.00E-05   | +      | 1           | SNP     | 24.4543  | 0 1.60361112696843 | 11748771    | 1           | NA  | T S                 | N 0-5 A;A T;T               |
| 10   | ABP1         | Homo sapiens amiloride binding protein 1 (amine oxidase (copper-containing)) (ABP1) mRNA.                     |         | NM_001091    | chr7 | 35.63 | 3.00E-05 | 1.6       | 1.00E-04   | +      | 1           | SNP     | 28.2543  | 0 1.60361112696843 | 15055605    | 5           | NA  | C T                 | N 0-5 G;G R;R               |
| 11   | OR51M1       | Homo sapiens olfactory receptor family 51 subfamily M member 1 (OR51M1) mRNA.                                 |         | NM_001004756 | chr1 | 30.23 | 6.00E-05 | 1.6       | 9.00E-04   | +      | 1           | SNP     | 22.8543  | 0 1.60361112696843 | 5411580     | 4           | NA  | T F                 | N 0-5 C;C L;L               |
| 12   | FMNL1        | Homo sapiens formin-like 1 (FMNL1) mRNA.                                                                      |         | NM_005892    | chr1 | 29.4  | 8.00E-05 | 1.6       | 1.00E-04   | +      | 1           | SNP     | 22.0843  | 0 1.60361112696843 | 43318779    | 4           | NA  | C P                 | N 0-5 G;G A;A               |



|     |           |                                                                                                                                           |                                                                 |              |      |           |          |      |          |   |   |     |             |                         |               |     |                                         |                                 |
|-----|-----------|-------------------------------------------------------------------------------------------------------------------------------------------|-----------------------------------------------------------------|--------------|------|-----------|----------|------|----------|---|---|-----|-------------|-------------------------|---------------|-----|-----------------------------------------|---------------------------------|
| 65  | GAL3ST2   | Homo sapiens galactose-3-O-sulfotransferase 2 (GAL3ST2) mRNA.                                                                             |                                                                 | NM_022134    | chr2 | 11.4<br>2 | 2.00E-03 | 0.18 | 4.00E-03 | + | 1 | SNP | 10.59       | 0 0.180112436754<br>885 | 24274353<br>2 | NA  | T L                                     | N 0,3 T:C L:P                   |
| 66  | PALM2     | Homo sapiens A kinase (PKA) anchor protein 2 (AKAP2) transcript variant 2 mRNA.                                                           |                                                                 | NM_007203    | chr9 | 24.1<br>6 | 2.00E-03 | 1.6  | 2.00E-03 | + | 2 | SNP | 2.64<br>43  | 0 1.603611126968<br>43  | 11289936<br>1 | NA  | A K                                     | N 0-5 C:C Q:Q                   |
|     |           |                                                                                                                                           |                                                                 |              |      |           |          |      |          |   |   | ins | 14.14<br>43 | 11290034<br>1           | NA            | - - | 2-5 GAAGCT-- EA--;1 GAAGCT:GAAGCT EA:EA |                                 |
| 67  | IRF2BP2   | Homo sapiens interferon regulatory factor 2 binding protein 2 (IRF2BP2) transcript variant 1 mRNA.                                        |                                                                 | NM_001077397 | chr1 | 13.3<br>7 | 2.00E-03 | 1.6  | 1.00E-03 | - | 1 | SNP | 5.98        | 0 1.602893807354<br>75  | 23474500<br>9 | 25  | A S                                     | B 0-5 G:G P:P                   |
| 68  | ISCU      | Homo sapiens iron-sulfur cluster scaffold homolog (E. coli) (ISCU) nuclear gene encoding mitochondrial protein transcript variant 2 mRNA. |                                                                 | NM_213595    | chr1 | 36.3<br>2 | 2.00E-03 | 1.6  | 3.00E-03 | + | 1 | SNP | 28.93       | 0 0                     | 10895641<br>8 | NA  | T F                                     | N 0-5 G:G C:C                   |
| 69  | PSD3      | Homo sapiens pleckstrin and Sec7 domain containing 3 (PSD3) transcript variant 2 mRNA.                                                    |                                                                 | NM_015310    | chr8 | 32.3<br>5 | 2.00E-03 | 1.6  | 1.00E-02 | - | 1 | SNP | 24.97       | 0 1.602893807354<br>75  | 18729817      | NA  | G T                                     | N 0-5 A:A M:M                   |
| 70  | OR9G9     | Homo sapiens olfactory receptor family 9 subfamily G member 9 (OR9G9) mRNA.                                                               |                                                                 | NM_001013358 | chr1 | 21.1<br>2 | 2.00E-03 | 1.6  | 6.00E-03 | + | 2 | SNP | 4.21<br>43  | 0 1.603611126968<br>43  | 56468020      | 2   | T C                                     | B 0-5 T:C C:R                   |
|     |           |                                                                                                                                           |                                                                 |              |      |           |          |      |          |   |   | SNP | 9.79<br>43  | 56468021                | NA            | G C | N 0-5 A:G Y:C                           |                                 |
| 71  | TELO2     | Homo sapiens TEL2 telomere maintenance 2 homolog (S. cerevisiae) (TELO2) mRNA.                                                            |                                                                 | NM_016111    | chr1 | 30.2<br>6 | 2.00E-03 | 1.6  | 2.00E-02 | + | 1 | SNP | 22.86<br>43 | 0 1.603611126968<br>43  | 1544302       | NA  | A E                                     | N 0-4 A:G E:G;N 5 G:G G:G       |
| 72  | NEURL     | Homo sapiens neuralized homolog (Drosophila) (NEURL) mRNA.                                                                                | Notch Signaling Pathway;Nervous System Development              | NM_004210    | chr1 | 6.58<br>0 | 3.00E-03 | 0.18 | 2.00E-03 | + | 1 | SNP | 5.74        | 0 0.180112436754<br>885 | 10534445<br>1 | 115 | G G                                     | B 0,3-5 A:A S:5;B 1-2 A:G S:G   |
| 73  | PTPLA     | Homo sapiens protein tyrosine phosphatase-like (proline instead of catalytic arginine) member A (PTPLA) mRNA.                             |                                                                 | NM_014241    | chr1 | 25.3<br>0 | 3.00E-03 | 1.6  | 4.00E-03 | - | 1 | SNP | 17.94       | 0 0                     | 17659149      | 2   | C E                                     | B 0-5 T:T K:K                   |
| 74  | CDC42EP1  | Homo sapiens CDC42 effector protein (Rho GTPase binding) 1 (CDC42EP1) mRNA.                                                               |                                                                 | NM_152243    | chr2 | 18.7<br>2 | 3.00E-03 | 1.6  | 1.00E-03 | + | 1 | del | 11.31       | 0 1.602893807354<br>75  | 37964409      | NA  | CAGCGCGCTGCTGCAACCCT PAPAANPS           | 0-5 :- :-                       |
| 75  | EMR3      | Homo sapiens egf-like module containing mucin-like hormone receptor-like 3 (EMR3) mRNA.                                                   | Neurological system process;Neurontransmitter Secretion         | NM_032571    | chr1 | 12.9<br>9 | 3.00E-03 | 1.6  | 2.00E-03 | - | 1 | SNP | 5.59        | 0 1.602893807354<br>75  | 14769339      | 16  | C E                                     | B 0-5 G:G Q:Q                   |
| 76  | HOMER2    | Homo sapiens homeobox and leucine zipper encoding (HOMER2) mRNA.                                                                          | Transcription Factor                                            | NM_020834    | chr1 | 25.7<br>4 | 3.00E-03 | 2.77 | 3.00E-03 | - | 1 | del | 12.96       | 0 2.783903603575<br>84  | 23744827      | NA  | TCC EE                                  | 2 :- :-;0-1,3-5 :-TCC :-EE      |
| 77  | TRNP1     | Homo sapiens TMF1-regulated nuclear protein 1 (TRNP1) mRNA.                                                                               |                                                                 | NM_001013642 | chr1 | 10.7<br>0 | 3.00E-03 | 1.6  | 2.00E-03 | + | 1 | SNP | 3.3         | 0 1.602893807354<br>75  | 27320356      | 27  | T W                                     | B 0-5 C:C R:R                   |
| 78  | SLC6A15   | Homo sapiens solute carrier family 6 (neutral amino acid transporter) member 15 (SLC6A15) transcript variant 2 mRNA.                      | Neurological system process                                     | NM_018057    | chr1 | 16.5<br>2 | 3.00E-03 | 1.6  | 4.00E-03 | - | 1 | SNP | 9.2         | 0 1.602893807354<br>75  | 85277561      | 70  | T D                                     | B 0-5 A:A V:V                   |
| 79  | SAMD11    | Homo sapiens sterile alpha motif domain containing 11 (SAMD11) mRNA.                                                                      |                                                                 | NM_152486    | chr1 | 23.8<br>5 | 3.00E-03 | 1.6  | 5.00E-03 | + | 1 | SNP | 16.87       | 0 1.603611126968<br>43  | 877831        | 4   | T W                                     | B 0-5 C:C R:R                   |
| 80  | COG3      | Homo sapiens component of oligomeric golgi complex 3 (COG3) mRNA.                                                                         |                                                                 | NM_031431    | chr1 | 17.7<br>3 | 3.00E-03 | 1.6  | 3.00E-03 | + | 1 | SNP | 10.32       | 0 1.602893807354<br>75  | 46108853      | 27  | T L                                     | B 0-5 C:C S:S                   |
| 81  | TNFRSF10C | Homo sapiens tumor necrosis factor receptor superfamily member 10c decoy without an intracellular domain (TNFRSF10C) mRNA.                | MAPKKK cascade;Nervous System Development;NF-KappaB Cascade     | NM_003841    | chr8 | 13.9<br>7 | 3.00E-03 | 1.6  | 4.00E-03 | + | 1 | SNP | 6.58        | 0 1.602893807354<br>75  | 22974450      | 62  | T I                                     | B 0-5 C:C T:T                   |
| 82  | NOL10     | Homo sapiens nucleolar protein 10 (NOL10) mRNA.                                                                                           |                                                                 | NM_024894    | chr2 | 9.86<br>0 | 4.00E-03 | 0.18 | 4.00E-03 | - | 1 | SNP | 9.02        | 0 0.180112436754<br>885 | 10717806      | 81  | C D                                     | B 1,5 T:C N:D;B 0,2-4 T:T N:N   |
| 83  | RFX1      | Homo sapiens regulatory factor X 1 (influences HLA class II expression) (RFX1) mRNA.                                                      | Transcription Factor                                            | NM_002918    | chr1 | 2.87<br>9 | 4.00E-03 | 0.18 | 4.00E-03 | - | 1 | SNP | 2.03        | 0 0.180112436754<br>885 | 14083761      | 56  | T T                                     | B 0,2-3,5 C:C A:A;B 1,4 T:C T:A |
| 84  | WWC2      | Homo sapiens WW and C2 domain containing 2 (WWC2) mRNA.                                                                                   |                                                                 | NM_024949    | chr4 | 16.3<br>0 | 4.00E-03 | 1.6  | 3.00E-03 | + | 1 | SNP | 8.91        | 0 1.602893807354<br>75  | 18419023<br>3 | 49  | G A                                     | B 2-5 T:G S:A;B 0 T:T S:S       |
| 85  | MLLT6     | Homo sapiens myeloid/lymphoid or mixed-lineage leukemia (trithorax homolog Drosophila); translocated to 6 (MLLT6) mRNA.                   | Transcription Factor                                            | NM_005937    | chr1 | 16.6<br>7 | 4.00E-03 | 1.6  | 2.00E-03 | + | 1 | SNP | 9.44        | 0 1.603611126968<br>43  | 36861983      | 6   | T V                                     | B 0-5 C:C A:A                   |
| 86  | PCLO      | Homo sapiens piccolo (presynaptic cytomatrix protein) (PCLO) transcript variant 2 mRNA.                                                   | Neurological system process;Neurontransmitter Secretion         | NM_033026    | chr7 | 40.2<br>4 | 4.00E-03 | 1.6  | 1.00E-01 | - | 1 | ins | 32.86       | 0 1.603611126968<br>43  | 82581488      | NA  | - -                                     | 0-5 TCA:TC A**                  |
| 87  | PARP9     | Homo sapiens poly (ADP-ribose) polymerase family member 9 (PARP9) transcript variant 6 mRNA.                                              |                                                                 | NM_031458    | chr3 | 21.2<br>9 | 4.00E-03 | 2.78 | 6.00E-03 | - | 1 | SNP | 8.46        | 0 2.783903603575<br>84  | 12227726<br>8 | 51  | G S                                     | B 0 A:A L:L;B 2-5 A:G L:L       |
| 88  | ZP3       | Homo sapiens zona pellucida glycoprotein 3 (sperm receptor) (ZP3) transcript variant 1 mRNA.                                              |                                                                 | NM_001110354 | chr7 | 14.4<br>6 | 4.00E-03 | 1.6  | 5.00E-03 | + | 1 | SNP | 7.07        | 0 1.602893807354<br>75  | 76054372      | 89  | G G                                     | B 0-5 A:A R:R                   |
| 89  | ZNF534    | Homo sapiens zinc finger protein 534 (ZNF534) transcript variant 2 mRNA.                                                                  | Transcription Factor                                            | NM_001143939 | chr1 | 20.6<br>9 | 4.00E-03 | 1.6  | 5.00E-03 | + | 1 | SNP | 13.22       | 0 1.603611126968<br>43  | 52942445      | 10  | C H                                     | B 0-5 T:T Y:Y                   |
| 90  | SOBP      | Homo sapiens sine oculis binding protein homolog (Drosophila) (SOBP) mRNA.                                                                |                                                                 | NM_018013    | chr6 | 13.8<br>0 | 5.00E-03 | 1.6  | 3.00E-03 | + | 1 | SNP | 6.41        | 0 1.602893807354<br>75  | 10795609<br>5 | 32  | A S                                     | B 0-5 G:G G:G                   |
| 91  | BCLAF1    | Homo sapiens BCL2-associated transcription factor 1 (BCLAF1) transcript variant 1 mRNA.                                                   | Transcription Factor                                            | NM_001077440 | chr6 | 20.4<br>7 | 5.00E-03 | 1.6  | 7.00E-03 | - | 2 | SNP | 8.61<br>75  | 0 1.602893807354<br>75  | 13659069<br>8 | NA  | C R                                     | N 0,4-5 T:C H:R                 |
|     |           |                                                                                                                                           |                                                                 |              |      |           |          |      |          |   |   | SNP | 0.62<br>75  | 13659728<br>8           | 19            | A Y | B 0-5 A:C Y:D                           |                                 |
| 92  | TXNDC2    | Homo sapiens thioredoxin domain containing 2 (spermatzoa) (TXNDC2) transcript variant 1 mRNA.                                             | Oxidative stress response;Stress Response                       | NM_001098529 | chr1 | 18.5<br>8 | 5.00E-03 | 1.6  | 1.00E-02 | + | 1 | SNP | 11.15       | 0 1.602893807354<br>75  | 9887497       | 6   | G E                                     | B 0-5 A:A K:K                   |
| 93  | AOX1      | Homo sapiens aldehyde oxidase 1 (AOX1) mRNA.                                                                                              |                                                                 | NM_001159    | chr2 | 11.8<br>9 | 5.00E-03 | 0.18 | 7.00E-03 | + | 1 | SNP | 11.06       | 0 0.180112436754<br>885 | 20147859<br>8 | NA  | C A                                     | N 0,2-3 T:C V:A                 |
| 94  | MEGF10    | Homo sapiens multiple EGF-like-domains 10 (MEGF10) mRNA.                                                                                  | Nervous System Development                                      | NM_032446    | chr5 | 18.4<br>6 | 6.00E-03 | 2.78 | 6.00E-03 | + | 1 | SNP | 5.63        | 0 2.783903603575<br>84  | 12679128<br>2 | 69  | G R                                     | B 0 A:A K:K;B 2-5 A:G K:R       |
| 95  | ARID3A    | Homo sapiens AT rich interactive domain 3A (BRIGHT-like) (ARID3A) mRNA.                                                                   | Transcription Factor                                            | NM_005224    | chr1 | 20.1<br>9 | 6.00E-03 | 1.6  | 6.00E-03 | + | 1 | SNP | 12.76       | 0 1.603611126968<br>43  | 971949        | NA  | G G                                     | N 0-5 A:A S:S                   |
| 96  | NCOR2     | Homo sapiens nuclear receptor corepressor 2 (NCOR2) transcript variant 1 mRNA.                                                            | Transcription Factor;Notch Signaling Pathway;Huntington Disease | NM_001077261 | chr1 | 35.0<br>2 | 6.00E-03 | 1.6  | 6.00E-02 | - | 1 | ins | 27.63       | 0 1.603611126968<br>43  | 12488705<br>8 | NA  | - -                                     | 0-5 GCT:GCT S:S                 |
| 97  | MLL3      | Homo sapiens myeloid/lymphoid or mixed-lineage leukemia 3 (MLL3) mRNA.                                                                    |                                                                 | NM_170606    | chr7 | 31.1<br>0 | 7.00E-03 | 1.6  | 3.00E-02 | - | 2 | SNP | 12.42<br>43 | 0 1.603611126968<br>43  | 15194500<br>1 | NA  | C G                                     | N 1-2,5 T:C S:G                 |
|     |           |                                                                                                                                           |                                                                 |              |      |           |          |      |          |   |   | ins | 13.55<br>43 | 15194507<br>1           | NA            | - Y | 0-5 :-T :-N                             |                                 |
| 98  | ZNRF4     | Homo sapiens zinc and ring finger 4 (ZNRF4) mRNA.                                                                                         |                                                                 | NM_181710    | chr1 | 16.6<br>9 | 7.00E-03 | 2.78 | 7.00E-03 | + | 1 | SNP | 3.83        | 0 2.783903603575<br>84  | 5455735       | 128 | G R                                     | B 2,4 A:A Q:Q;B 0-1,3,5 A:G Q:R |
| 99  | PLIN4     | Homo sapiens perilipin 4 (PLIN4) mRNA.                                                                                                    |                                                                 | NM_001080400 | chr1 | 31.4<br>9 | 7.00E-03 | 1.6  | 1.00E-01 | - | 1 | SNP | 24.04       | 0 1.603611126968<br>43  | 4511453       | NA  | G A                                     | N 0-5 A:A V:V                   |
| 100 | KIF27     | Homo sapiens kinesin family member 27 (KIF27) mRNA.                                                                                       |                                                                 | NM_017576    | chr9 | 18.4<br>2 | 8.00E-03 | 2.78 | 8.00E-03 | - | 1 | SNP | 5.59        | 0 2.783903603575<br>84  | 86474115      | 96  | T N                                     | B 0 C D:D;B 2-5 T:C N:D         |
| 101 | GPR44     | Homo sapiens prostaglandin D2 receptor 2 (PTGDR2) mRNA.                                                                                   | Neurological system process;G-protein coupled receptor          | NM_004778    | chr1 | 8.36<br>1 | 8.00E-03 | 1.6  | 6.00E-03 | - | 1 | SNP | 0.96        | 0 1.602893807354<br>75  | 60620585      | 40  | A V                                     | B 0-5 G:G A:A                   |
| 102 | RIN3      | Homo sapiens Ras and Rab interactor 3 (RIN3) mRNA.                                                                                        |                                                                 | NM_024832    | chr1 | 19.5<br>4 | 8.00E-03 | 1.6  | 1.00E-02 | + | 1 | SNP | 12.12       | 0 1.602893807354<br>75  | 93118229      | 44  | C R                                     | B 0-5 T:T C:C                   |
| 103 | ZMYM5     | Homo sapiens zinc finger MYM-type 5 (ZMYM5) transcript variant 1 mRNA.                                                                    | Transcription Factor                                            | NM_001039649 | chr1 | 17.9<br>3 | 9.00E-03 | 1.6  | 1.00E-02 | - | 1 | SNP | 10.54       | 0 1.602816540651<br>69  | 20425911      | 72  | C C                                     | N 4 A:A F:F;B 0-3,5 A:C F:C     |
| 104 | BPIL1     | Homo sapiens BPI fold containing family B member 2 (BPFB2) mRNA.                                                                          | Stress Response                                                 | NM_025227    | chr2 | 0<br>5    | 1.00E-02 | 0.18 | 8.00E-03 | + | 1 | SNP | 4.31        | 0 0.180112436754<br>885 | 31596472      | 97  | A K                                     | B 1,5 A:T K:M;B 0,2-4 T:T M:M   |
| 105 | CDC27     | Homo sapiens cell division cycle 27 homolog (S. cerevisiae) (CDC27) transcript variant 2 mRNA.                                            |                                                                 | NM_001114091 | chr1 | 36.9<br>7 | 1.00E-02 | 1.58 | 5.00E-02 | - | 2 | SNP | 15.6<br>43  | 0 1.603611126968<br>43  | 45234360      | 2   | A L                                     | B 0-5 A:C L:*                   |
|     |           |                                                                                                                                           |                                                                 |              |      |           |          |      |          |   |   | SNP | 14.63<br>43 | 45249316<br>1           | NA            | T Y | N 0-5 T:C Y:C                           |                                 |
| 106 | CDHR3     | Homo sapiens cadherin-related family member 3 (CDHR3) mRNA.                                                                               |                                                                 | NM_152750    | chr7 | 15.9<br>6 | 1.00E-02 | 1.6  | 1.00E-02 | + | 1 | SNP | 8.57        | 0 1.602816540651<br>69  | 10565845<br>1 | 126 | G C                                     | B 0-5 A:A Y:Y                   |
| 107 | PRIM2     | Homo sapiens primase DNA polypeptide 2 (58kDa) (PRIM2) mRNA.                                                                              |                                                                 | NM_000947    | chr6 | 18.8<br>6 | 1.00E-02 | 1.6  | 1.00E-02 | + | 2 | SNP | 6.42<br>0 0 | 57398270                | 416           | C Q | B 0,2-5 T:C *Q                          |                                 |
|     |           |                                                                                                                                           |                                                                 |              |      |           |          |      |          |   |   | ins | 5.06<br>0 0 | 57398186                | NA            | - E | 0-5 A:- K:-                             |                                 |
| 108 | SSCS5D    | Homo sapiens scavenger receptor cysteine rich domain containing (5 domains) (SSCS5D) transcript variant 2 mRNA.                           |                                                                 | NM_001144950 | chr1 | 31.2<br>9 | 1.00E-02 | 0.78 | 5.00E-02 | + | 1 | ins | 27.63       | 0 0.779126465217<br>891 | 56029616      | NA  | - -                                     | 0-1,4 :-CCA :-P;2-3 CCA:CCA P:P |
| 109 | C10orf92  | Homo sapiens tetraatricopeptide repeat domain 40 (TTC40) mRNA.                                                                            |                                                                 | NM_001200049 | chr1 | 23.9<br>0 | 1.00E-02 | 2.78 | 4.00E-02 | - | 2 | SNP | 1.91<br>84  | 0 2.783903603575<br>84  | 13464827<br>9 | 38  | C E                                     | B 0-1,3,5 T:C K:E;B 2,4 T:T K:K |
|     |           |                                                                                                                                           |                                                                 |              |      |           |          |      |          |   |   | SNP | 9.23<br>84  | 13466080<br>7           | NA            | C G | N 0,3,5 T:C S:G                         |                                 |
| 110 | C20orf151 | Homo sapiens chromosome 20 open reading frame 151 (C20orf151) mRNA.                                                                       | Transcription Factor                                            | NM_080833    | chr2 | 19.2<br>0 | 1.00E-02 | 1.6  | 2.00E-02 | - | 1 | SNP | 11.86       | 0 1.602893807354<br>75  | 60987737      | 29  | C E                                     | B 0-1,4-5 T:C K:E;B 2-3 T:T K:K |
| 111 | RP1L1     | Homo sapiens retinitis pigmentosa 1-like 1 (RP1L1) mRNA.                                                                                  | Neurological system process                                     | NM_178857    | chr8 | 38.4<br>8 | 1.00E-02 | 1.58 | 1.00E-01 | - | 2 | ins | 19.36<br>43 | 0 1.603611126968<br>43  | 10467685      | NA  | - -                                     | 1-3,5                           |



|     |                 |                                                                                                        |                      |                  |      |      |      |          |      |          |   |   | 75  |       |                    |          |     |     |                                 |               |
|-----|-----------------|--------------------------------------------------------------------------------------------------------|----------------------|------------------|------|------|------|----------|------|----------|---|---|-----|-------|--------------------|----------|-----|-----|---------------------------------|---------------|
| 163 | ZNF217          | Homo sapiens zinc finger protein 217 (ZNF217) mRNA.                                                    | Transcription Factor | NM_006526        | chr2 | 0    | 5.86 | 8.00E-01 | 0.83 | 2.00E-02 | - | 1 | SNP | 2.76  | 0 0                | 52192595 | 10  | C R | B 0,2-3 T:C Q:R                 |               |
| 164 | HLA-C_DUP_06    | NA                                                                                                     |                      | NM_002117_DUP_03 | chr6 | 3.49 |      | 8.00E-01 | 0.18 | 4.00E-01 | - | 1 | SNP | 23.81 | 0 1.60289380735475 | 31239776 | 1   | A C | B 0,2-3,5 A:C C:G;N 1,4 C:C G:G |               |
| 165 | SVEP1           | Homo sapiens sushi von Willebrand factor type A EGF and pentraxin domain containing 1 (SVEP1) mRNA.    |                      | NM_153366        | chr9 | 1.47 |      | 9.00E-01 | 0.14 | 1.00E-01 | - | 2 | SNP | 1.13  | 0 1.60289380735475 | 11316679 | 109 | A F | B 1,4-5 A:T F:I                 |               |
| 166 | MUC5B           | Homo sapiens mucin 5B oligomeric mucus/gel-forming (MUC5B) mRNA.                                       |                      | NM_002458        | chr1 | 1    | 3.34 | 9.00E-01 | 0.28 | 3.00E-01 | + | 1 | SNP | 20.56 | 0 1.60289380735475 | 11325195 | 20  | T I | B 0,2-3,5 T:C I:V               |               |
| 167 | TTN             | Homo sapiens titin (TTN) transcript variant novex-3 mRNA.                                              |                      | NM_133378        | chr2 | 0.72 |      | 1.00E+00 | 0.05 | 3.00E-01 | - | 2 | SNP | 11.23 | 0 1.60289380735475 | 1268608  | NA  | A S | N 0 G:G G:G                     |               |
|     | HLA-DQB1_DUP_02 | Homo sapiens major histocompatibility complex class II DQ beta 1 (HLA-DQB1) transcript variant 1 mRNA. |                      | NM_002123        | chr6 | 0.65 |      | 1.00E+00 | 0.05 | 4.00E-01 | - | 1 | SNP | 14.44 | 0 1.60289380735475 | 17940037 | 9   | NA  | A F                             | N 0,2 A:G F:L |
| 169 | HLA-A_DUP_07    | NA                                                                                                     |                      | NM_002116_DUP_03 | chr6 | 0.56 |      | 1.00E+00 | 0.03 | 3.00E-01 | + | 2 | SNP | 9.64  | 0 0                | 17944491 | 5   | 3   | A S                             | B 0,2 A:G S:P |
|     |                 |                                                                                                        |                      |                  |      |      |      |          |      |          |   |   | SNP | 5.15  | 0 1.60289380735475 | 32632745 | 4   | G A | B 0,2,4 A:A V:V;B 1,3,5 A:G V:A |               |
|     |                 |                                                                                                        |                      |                  |      |      |      |          |      |          |   |   | SNP | 12.82 | 0 1.60281654065169 | 29911271 | NA  | G E | N 1,3,5 C:G D:E                 |               |
|     |                 |                                                                                                        |                      |                  |      |      |      |          |      |          |   |   | SNP | 12.82 | 0 1.60281654065169 | 29911272 | NA  | T W | N 1,5 T:G W:G                   |               |
