# Supplementary material
Source: PubMed Central journal article supplement (PMC5847395)
Supplement: NIHMS883218-supplement-19.pdf [file NIHMS883218-supplement-19.pdf]

**Table S5 Brain structures with the highest *PNKD* exon 6 expression for each human subject**

| Expression (RPKM) | donor_id | age    | gender | structure_acronym | structure_name                                         |
|-------------------|----------|--------|--------|-------------------|--------------------------------------------------------|
| 6.462002          | 12890    | 4 mos  | M      | MD                | mediodorsal nucleus of thalamus                        |
| 1.610548          | 12297    | 6 mos  | F      | VFC               | ventrolateral prefrontal cortex                        |
| 2.451382          | 12977    | 10 mos | M      | ITC               | inferolateral temporal cortex (area TEv, area 20)      |
| 13.10173          | 12830    | 1 yrs  | F      | STR               | striatum                                               |
| 0.550969          | 12979    | 2 yrs  | F      | CBC               | cerebellar cortex                                      |
| 6.174245          | 12836    | 3 yrs  | F      | CBC               | cerebellar cortex                                      |
| 5.789877          | 12980    | 3 yrs  | M      | CBC               | cerebellar cortex                                      |
| 9.016101          | 12298    | 4 yrs  | M      | ITC               | inferolateral temporal cortex (area TEv, area 20)      |
| 10.020554         | 12841    | 8 yrs  | M      | S1C               | primary somatosensory cortex (area S1, areas 3,1,2)    |
| 19.472764         | 12981    | 8 yrs  | M      | V1C               | primary visual cortex (striate cortex, area V1/17)     |
| 16.872481         | 12289    | 11 yrs | F      | V1C               | primary visual cortex (striate cortex, area V1/17)     |
| 18.477811         | 12831    | 13 yrs | F      | S1C               | primary somatosensory cortex (area S1, areas 3,1,2)    |
| 25.635981         | 12299    | 15 yrs | M      | STR               | striatum                                               |
| 6.22946           | 12984    | 18 yrs | M      | DFC               | dorsolateral prefrontal cortex                         |
| 35.09306          | 12832    | 19 yrs | F      | V1C               | primary visual cortex (striate cortex, area V1/17)     |
| 37.374642         | 13057    | 21 yrs | F      | M1C               | primary motor cortex (area M1, area 4)                 |
| 16.095879         | 12300    | 23 yrs | M      | M1C               | primary motor cortex (area M1, area 4)                 |
| 38.378502         | 12290    | 30 yrs | F      | S1C               | primary somatosensory cortex (area S1, areas 3,1,2)    |
| 26.877621         | 12302    | 36 yrs | M      | IPC               | posteroventral (inferior) parietal cortex              |
| 51.100412         | 12303    | 37 yrs | M      | S1C               | primary somatosensory cortex (area S1, areas 3,1,2)    |
| 25.051741         | 12291    | 40 yrs | M      | S1C               | primary somatosensory cortex (area S1, areas 3,1,2)    |
| 28.768026         | 12304    | 40 yrs | F      | STC               | posterior (caudal) superior temporal cortex (area TAc) |
