# Supplementary material
Source: PubMed Central journal article supplement (PMC5847395)
Supplement: NIHMS883218-supplement-20.pdf [file NIHMS883218-supplement-20.pdf]

**TaqMan hPSC ScoreCard panel**

| Scores                    |              |          |          |          |
|---------------------------|--------------|----------|----------|----------|
| Sample Name               | Self-renewal | Ectoderm | Mesoderm | Endoderm |
| Unrelated Unaffected iPSC | -0.48        | -0.20    | 0.36     | -0.97    |
| Unaffected iPSC           | 0.30         | -0.39    | -0.94    | -1.33    |
| TD1 iPSC                  | -0.22        | -0.70    | -0.62    | -1.12    |
| TD2 iPSC                  | 0.06         | -0.94    | -0.48    | -1.06    |

**Gene expression relative to the reference standard**

|                        |               |
|------------------------|---------------|
| $x > 1.5$              | Upregulated   |
| $1.0 < x \leq 1.5$     |               |
| $0.5 < x \leq 1.0$     |               |
| $-0.5 \leq x \leq 0.5$ | Comparable    |
| $-1.0 \leq x < -0.5$   |               |
| $-1.5 \leq x < -1.0$   |               |
| $x < -1.5$             | Downregulated |

| Results                   |              |          |          |          |              |
|---------------------------|--------------|----------|----------|----------|--------------|
| Sample Name               | Self-renewal | Ectoderm | Mesoderm | Endoderm | Sendai Virus |
| Unrelated Unaffected iPSC | POSITIVE     | NEGATIVE | NEGATIVE | NEGATIVE | NOT DETECTED |
| Unaffected iPSC           | POSITIVE     | NEGATIVE | NEGATIVE | NEGATIVE | NOT DETECTED |
| TD1 iPSC                  | POSITIVE     | NEGATIVE | NEGATIVE | NEGATIVE | NOT DETECTED |
| TD2 iPSC                  | POSITIVE     | NEGATIVE | NEGATIVE | NEGATIVE | NOT DETECTED |
