# Supplementary material
Source: PubMed Central journal article supplement (PMC5847395)

**A**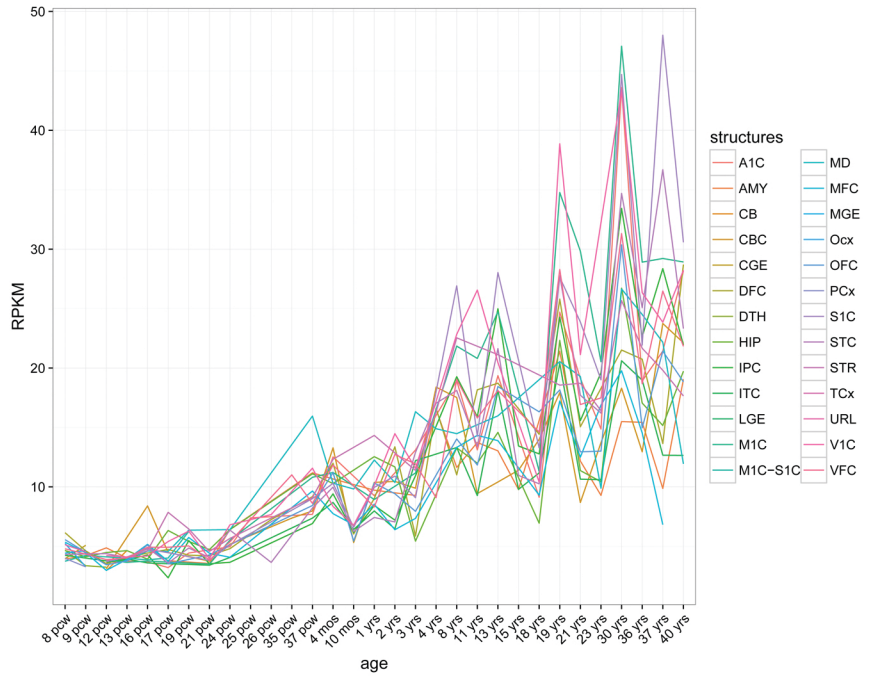**B**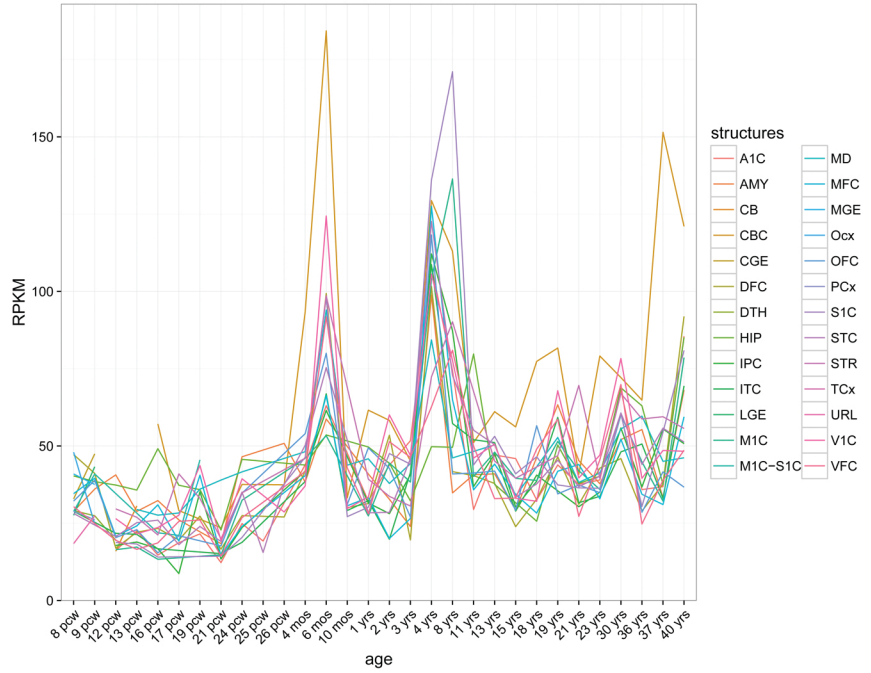

Supplement: NIHMS883218-supplement-10.pdf [file NIHMS883218-supplement-10.pdf]

**C**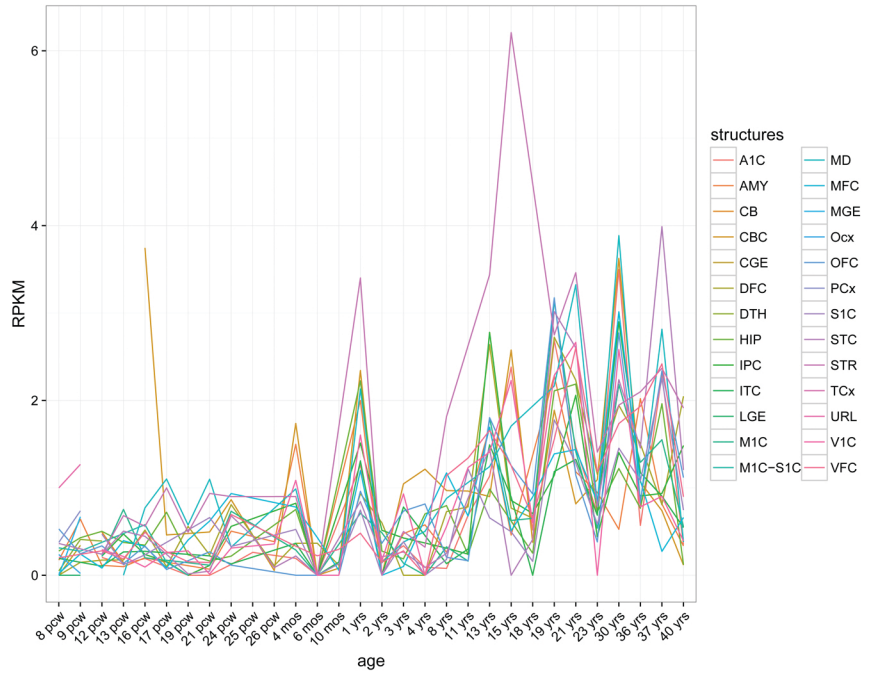**D**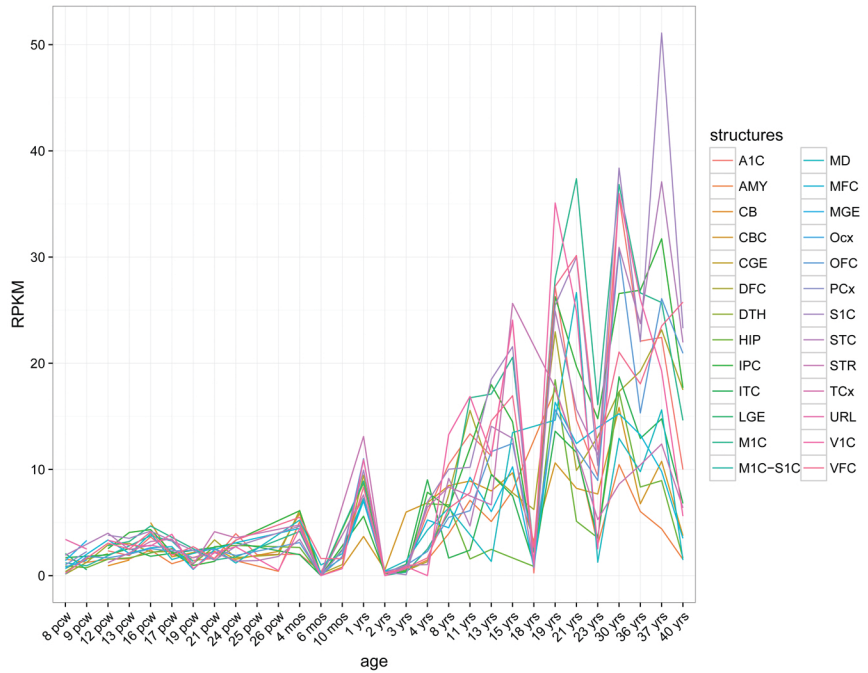

Supplement: NIHMS883218-supplement-11.pdf [file NIHMS883218-supplement-11.pdf]

**A**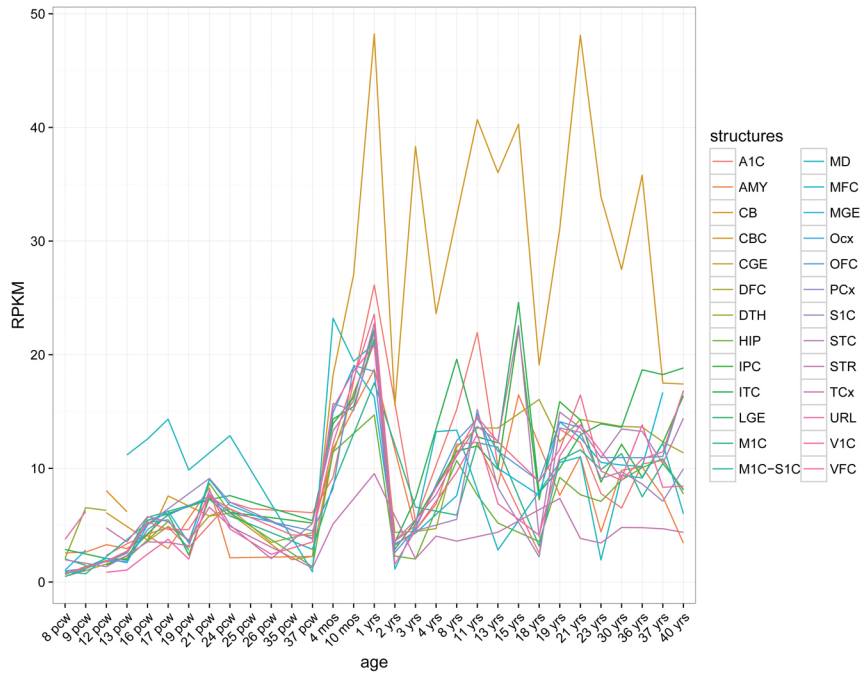**B**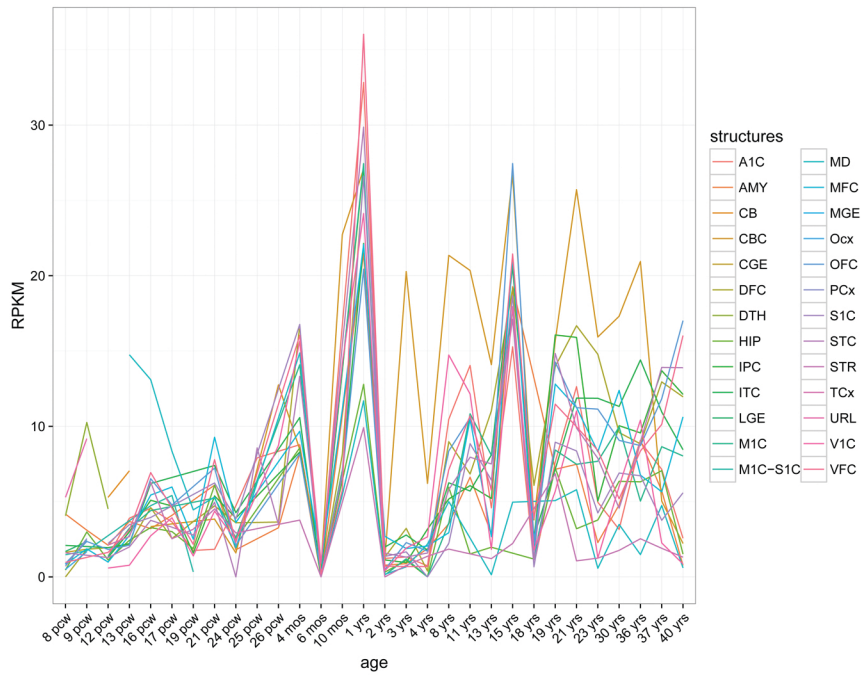

Supplement: NIHMS883218-supplement-12.pdf [file NIHMS883218-supplement-12.pdf]

**A**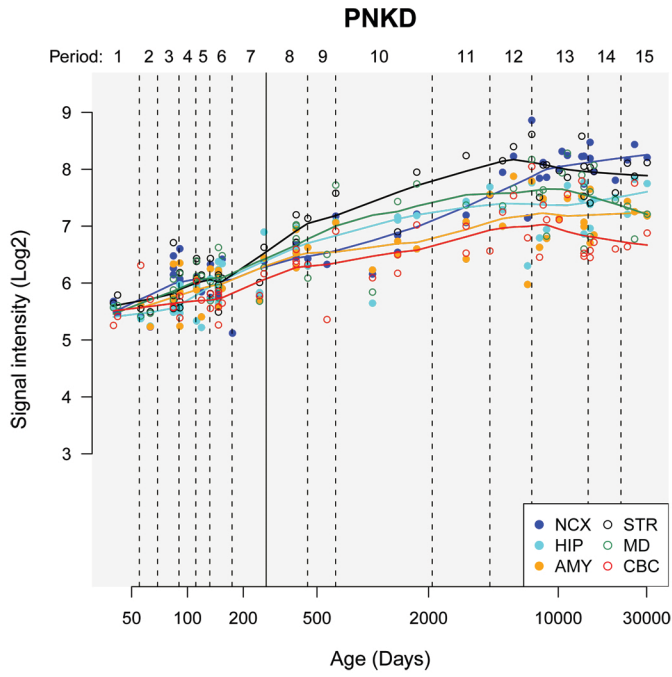**B**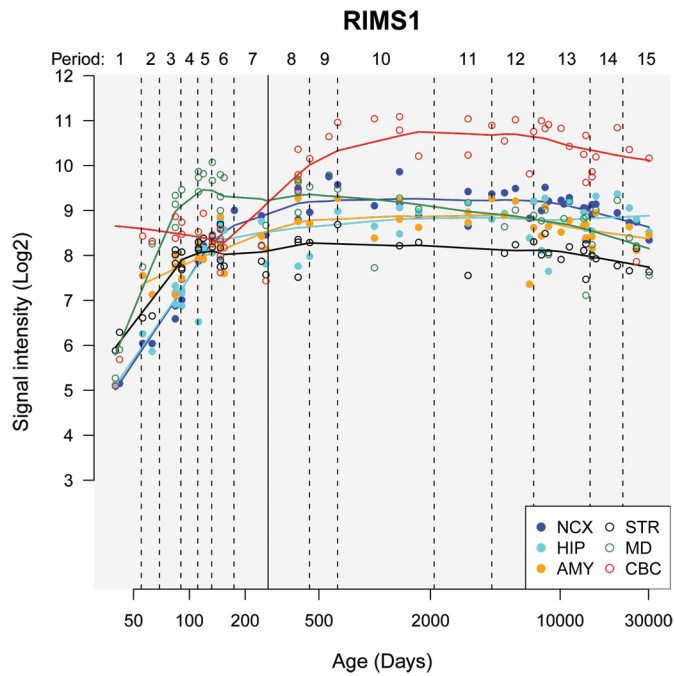

Supplement: NIHMS883218-supplement-13.pdf [file NIHMS883218-supplement-13.pdf]

**A**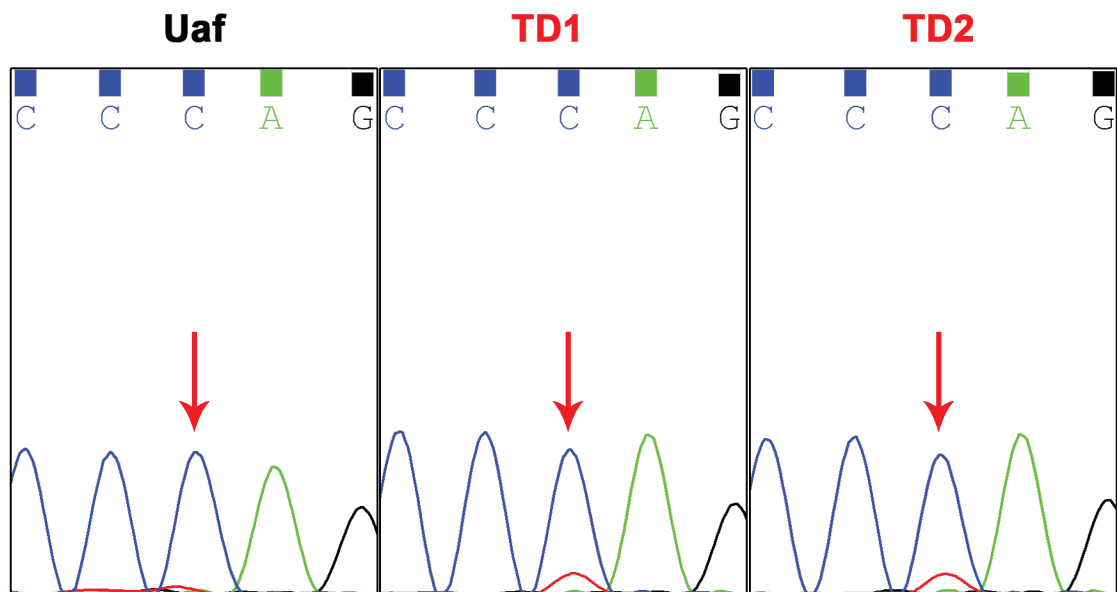**B**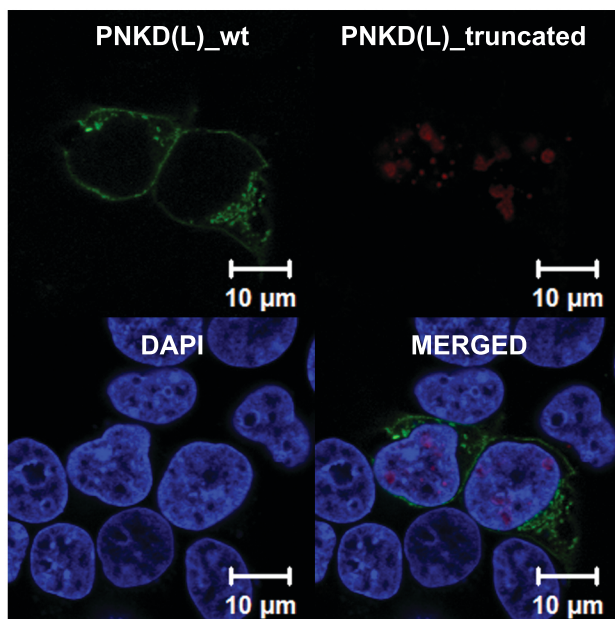

Supplement: NIHMS883218-supplement-14.pdf [file NIHMS883218-supplement-14.pdf]

Unaffected iPSC

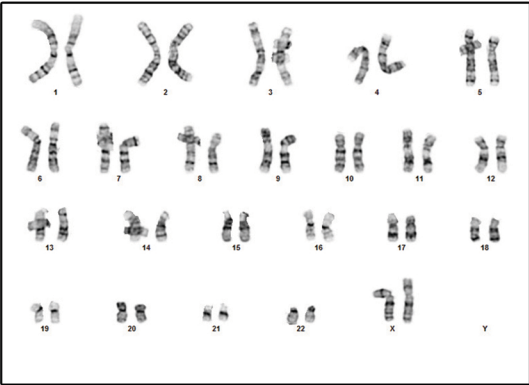

TD1 iPSC

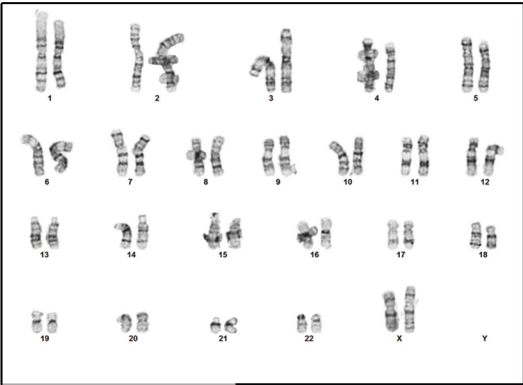

TD2 iPSC

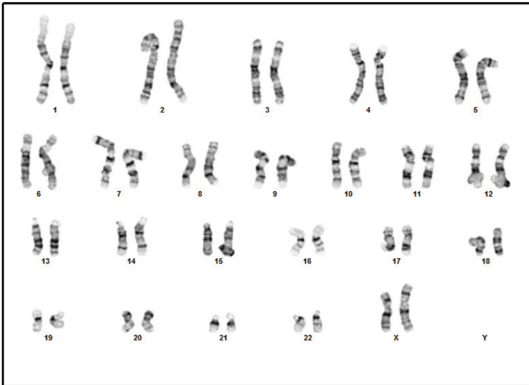

Supplement: NIHMS883218-supplement-3.pdf [file NIHMS883218-supplement-3.pdf]

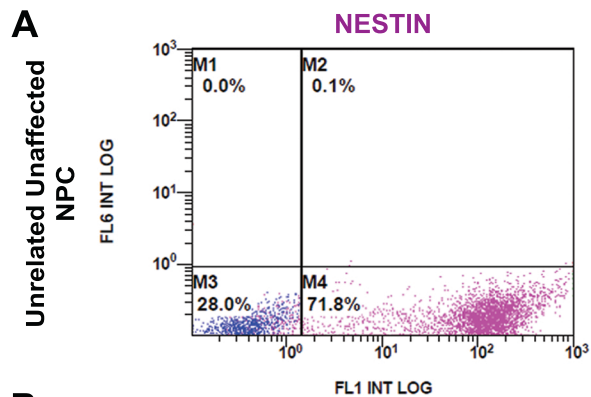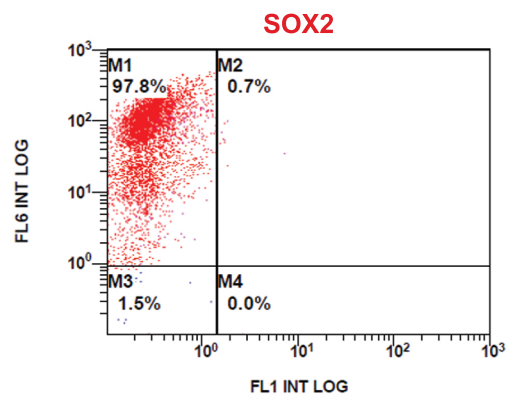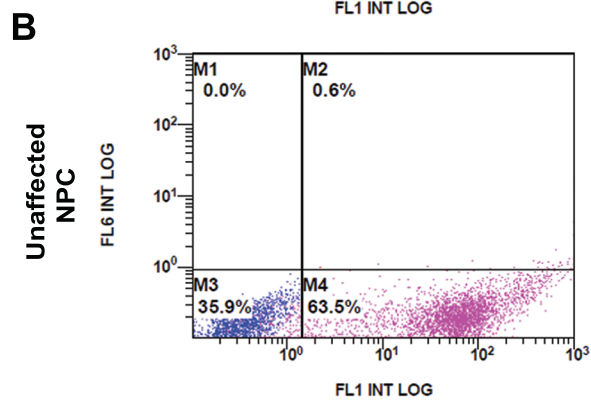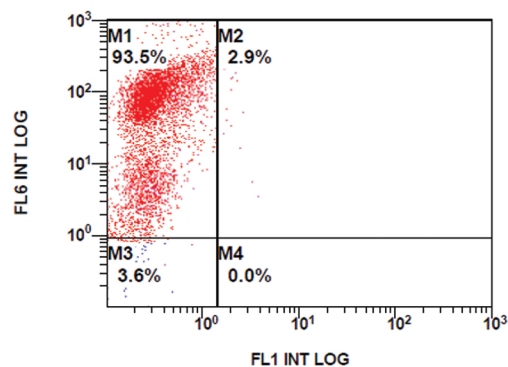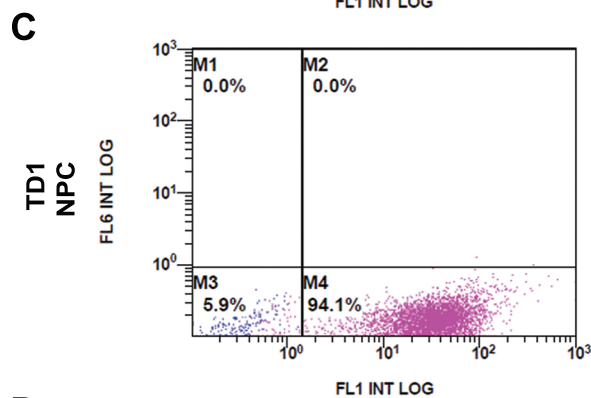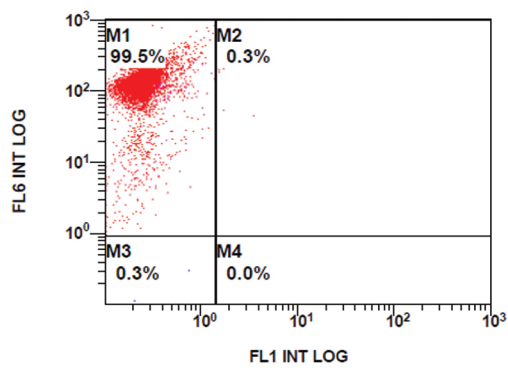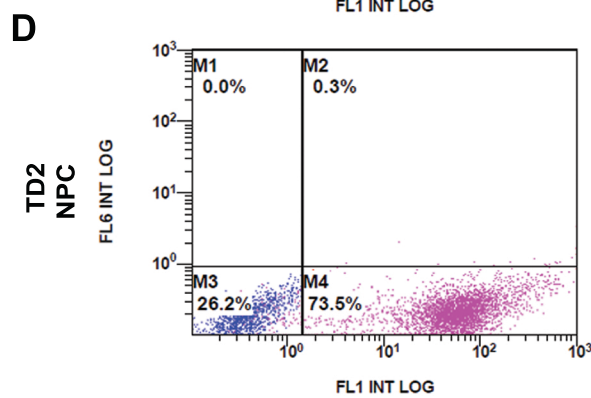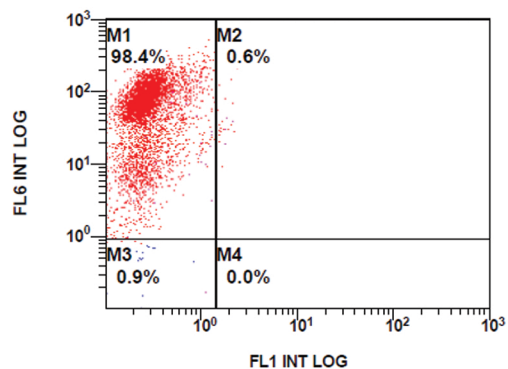

Supplement: NIHMS883218-supplement-5.pdf [file NIHMS883218-supplement-5.pdf]

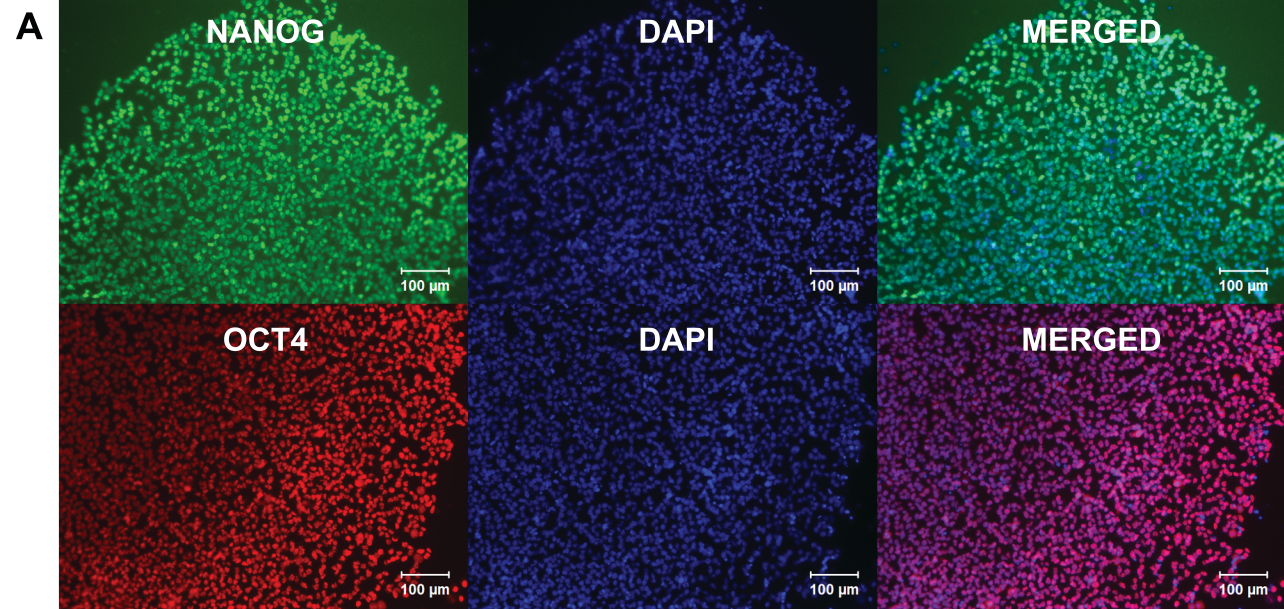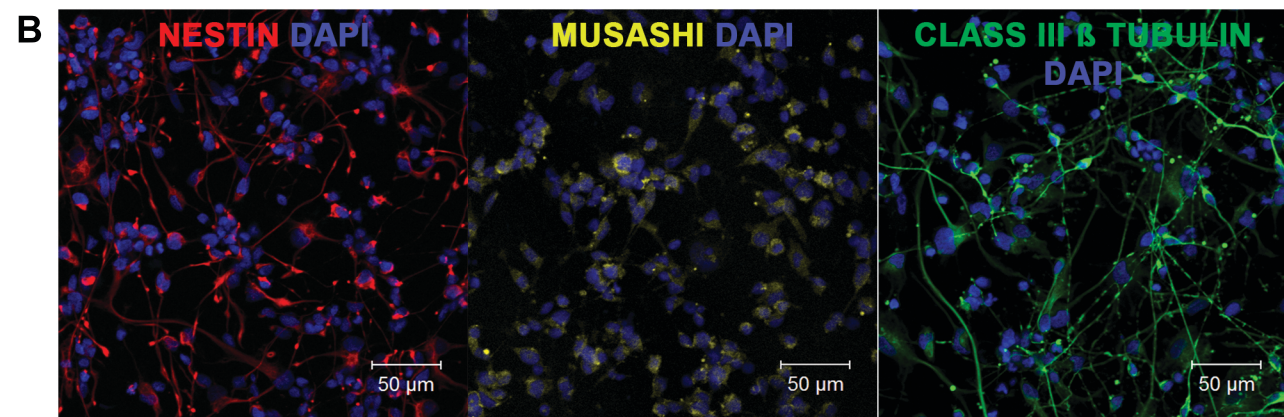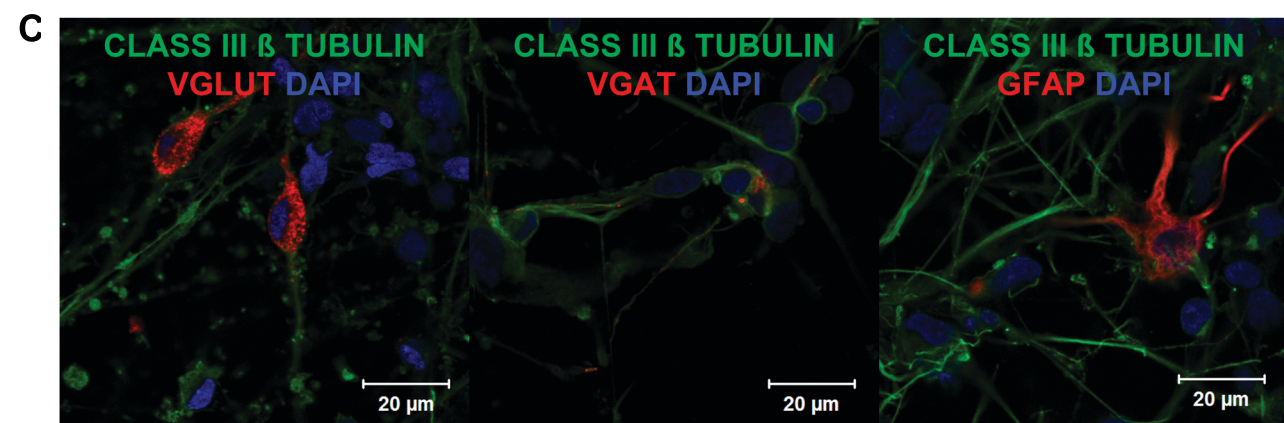

Supplement: NIHMS883218-supplement-6.pdf [file NIHMS883218-supplement-6.pdf]

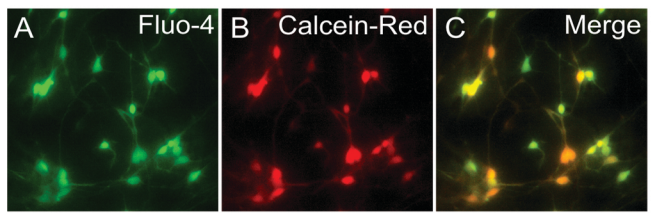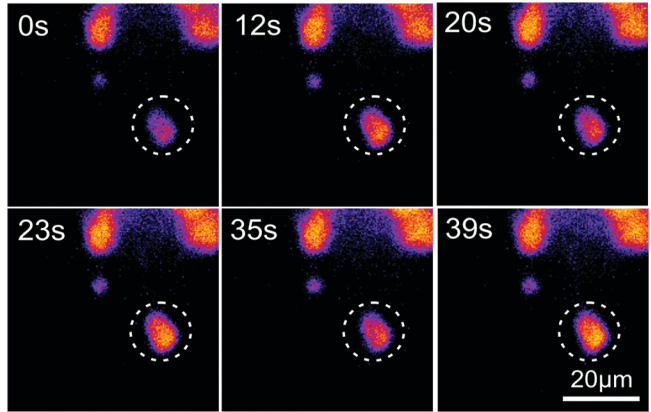

**D** Spontaneous  $\text{Ca}^{2+}$  influx

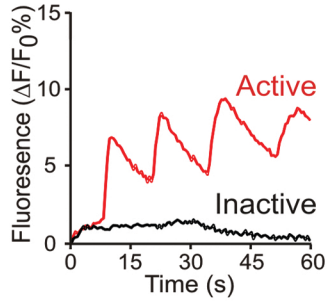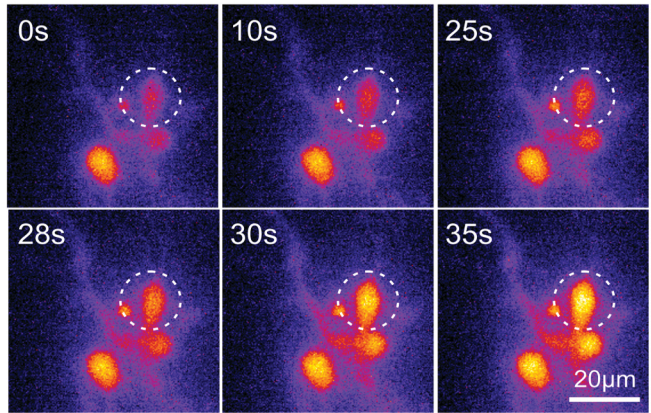

**E** Stimulated  $\text{Ca}^{2+}$  influx

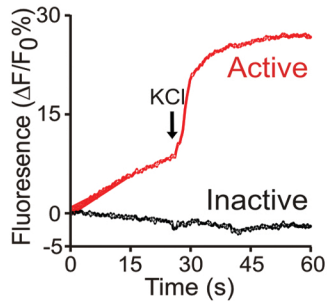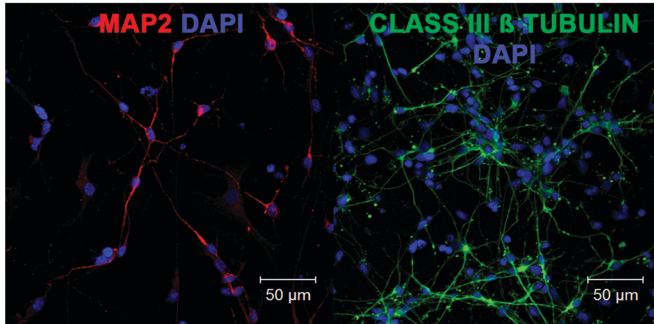

**G**

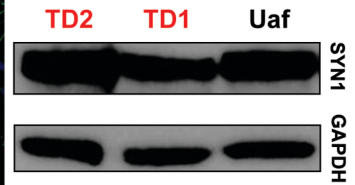

Supplement: NIHMS883218-supplement-7.pdf [file NIHMS883218-supplement-7.pdf]

**A** Unrelated Unaffected *PNKD* +/+

A C C C A G C

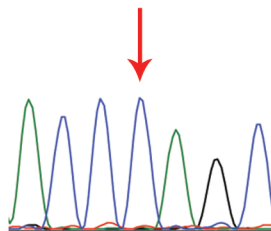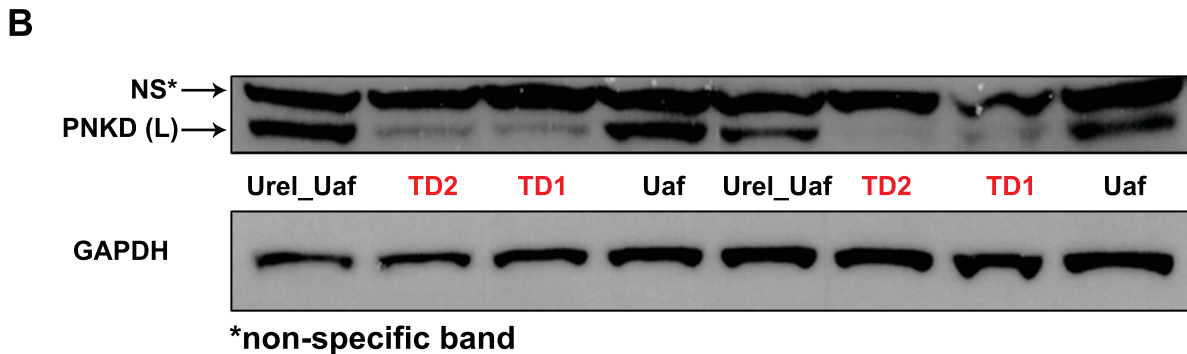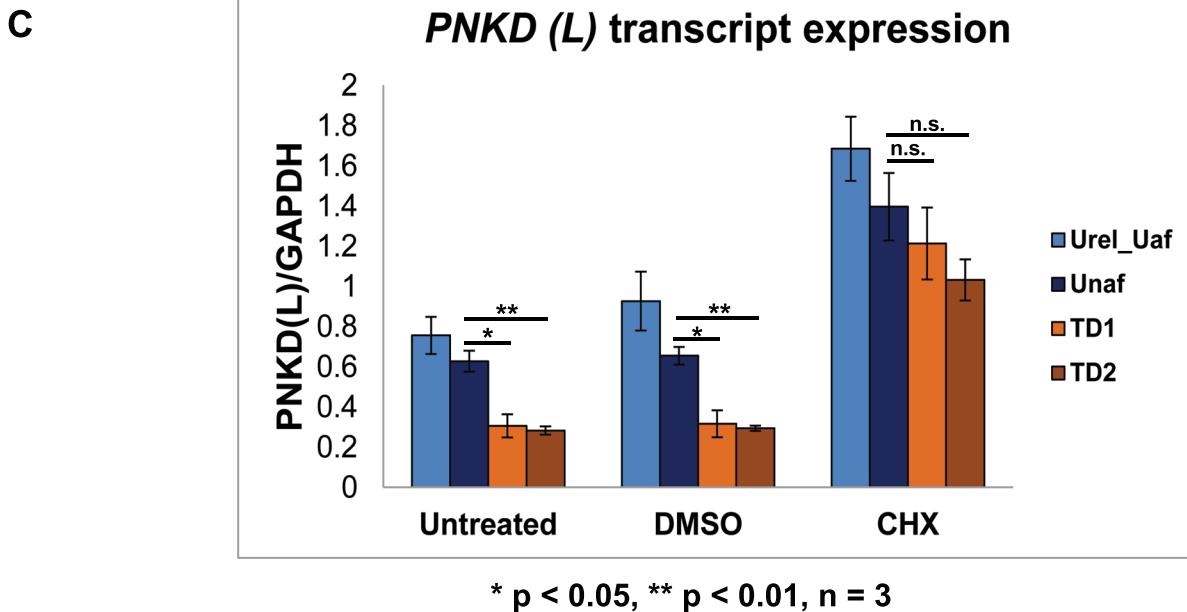

Supplement: NIHMS883218-supplement-8.pdf [file NIHMS883218-supplement-8.pdf]

**A**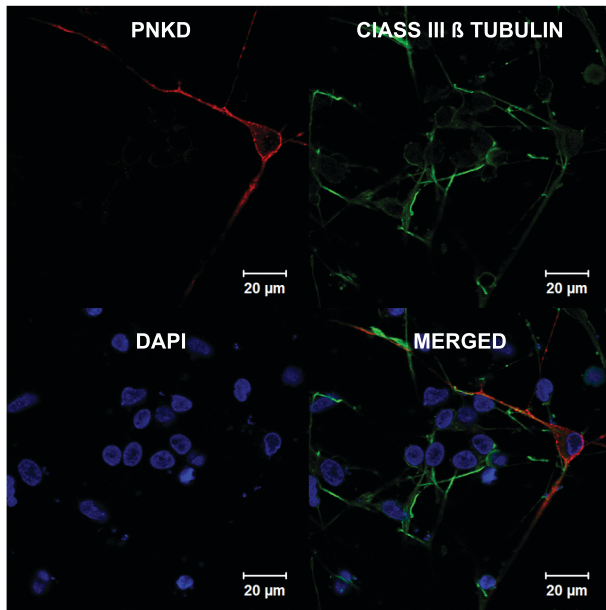**B**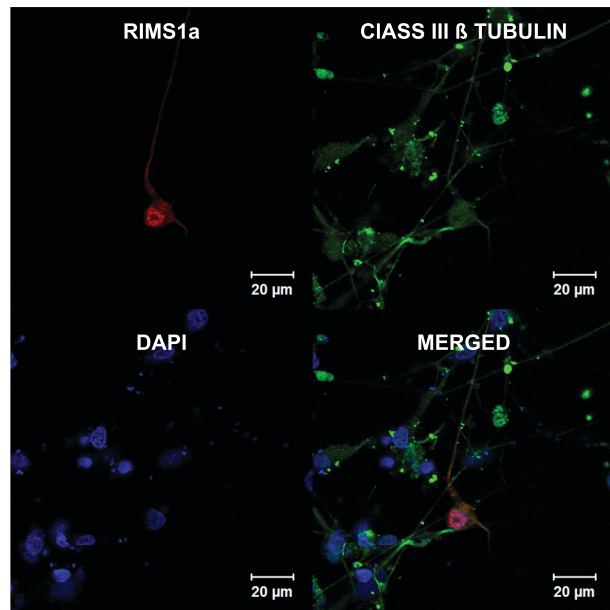**C**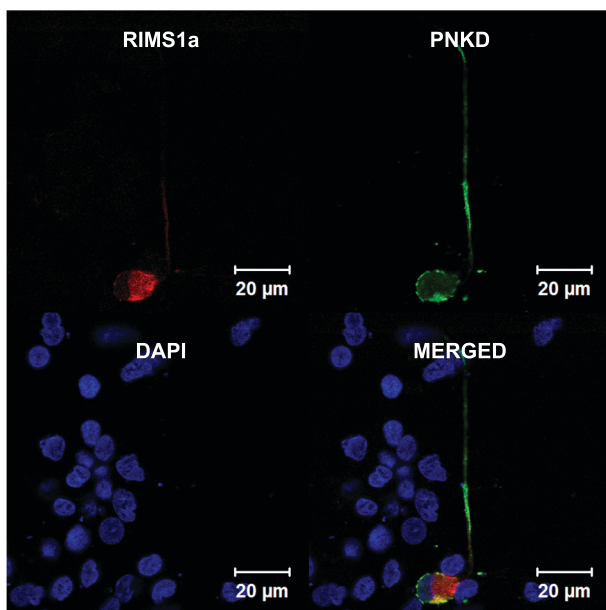

Supplement: NIHMS883218-supplement-9.pdf [file NIHMS883218-supplement-9.pdf]
